# Supplementary material
Source: PubMed Central journal article supplement (PMC8762478)
Supplement: mmc1.pdf [file mmc1.pdf]

**Supplemental information**

**SARS-CoV-2 infection enhances  
mitochondrial PTP complex activity to  
perturb cardiac energetics**

**Karthik Ramachandran, Soumya Maity, Alagar R. Muthukumar, Soundarya Kandala, Dhanendra Tomar, Tarek Mohamed Abd El-Aziz, Cristel Allen, Yuyang Sun, Manigandan Venkatesan, Travis R. Madaris, Kevin Chiem, Rachel Truitt, Neelanjan Vishnu, Gregory Aune, Allen Anderson, Luis Martinez, Wenli Yang, James D. Stockand, Brij B. Singh, Subramanya Srikantan, W. Brian Reeves, and Muniswamy Madesh**

**Table S1:** Patient characteristics and blood test results. Related to Figure 1

| Patient group                            | Normal     | Normal     | Mild/Moderate                                                           | Mild/Moderate                                            | Mild/Moderate                        | Severe                          | Severe                                                 |
|------------------------------------------|------------|------------|-------------------------------------------------------------------------|----------------------------------------------------------|--------------------------------------|---------------------------------|--------------------------------------------------------|
| Patient ID#                              | Normal-24C | Normal-25C | Symptomatic-11B                                                         | Symptomatic-12B                                          | Symptomatic-15B                      | Symptomatic-3A                  | Symptomatic-4A                                         |
| Age                                      | 52         | 59         | 56                                                                      | 85                                                       | 69                                   | 69                              | 57                                                     |
| Gender                                   | F          | F          | F                                                                       | F                                                        | F                                    | M                               | M                                                      |
| Chronic/Preexisting condition            | -          | -          | NIDDM-2, HLD, Morbid Obesity, HTN, CKD, BPD, Sleep Apnea, Schizophrenia | NIDDM-2, HLD, CHF, EF, HTN, CKD Aortic valve replacement | HTN, HLD, CHF, AICD, Volume overload | HLD                             | HCV, Obesity, HTN, HLD, ILD, Lung and Liver transplant |
| Self-reported initial symptoms           | -          | -          | Fever, Cough, Myalgia, Anorexia, thick phlegm                           | Cough, Malaise, Diarrhea                                 | Cough, Myalgia, SOB                  | Fever, Cough, Diarrhea          | Worsening SOB, ARDS                                    |
| Days from symptom onset to PCR test      | -          | -          | 3                                                                       | 3                                                        | 6                                    | 5                               | 5                                                      |
| PCR result                               | -          | -          | positive                                                                | positive                                                 | positive                             | positive                        | positive                                               |
| SARS-CoV-2 IgG                           | Negative   | Negative   | Negative                                                                | Negative                                                 | Negative                             | positive                        | positive                                               |
| Patient Isolation                        | -          | -          | At home quarantine                                                      | Hospitalized-COVID ward                                  | At home quarantine                   | Hospitalized -COVID ward to ICU | Hospitalized - ICU                                     |
| ICU/Intubation                           | -          | -          | No                                                                      | No                                                       | No                                   | Yes/Yes                         | Yes/Yes                                                |
| Outcome                                  | -          | -          | Recovered                                                               | Recovered & Discharged                                   | Recovered                            | Deceased                        | Recovered & Discharged                                 |
| LOS                                      | -          | -          | -                                                                       | 7 days                                                   | -                                    | 29 days                         | 77 days                                                |
| CRP (<= 5 mg/L)                          | -          | -          | -                                                                       | 130.9                                                    | -                                    | 149                             | 20                                                     |
| Hs-cTnT (22 ng/L)                        | <6         | <6         | 15                                                                      | 80                                                       | 12                                   | 17                              | 129                                                    |
| NT-proBNP (<900 pg/ml)                   | 35         | 21         | 245                                                                     | 1456 (<1800)                                             | 756                                  | 2475                            | 8014                                                   |
| WBC (4-11 x 10 <sup>9</sup> /L)          | -          | -          | 4.59                                                                    | 8.30                                                     | 3.44                                 | 9.23                            | 25.42                                                  |
| Platelets (150-450 x 10 <sup>9</sup> /L) | -          | -          | 265                                                                     | 207                                                      | 155                                  | 211                             | 158                                                    |



A

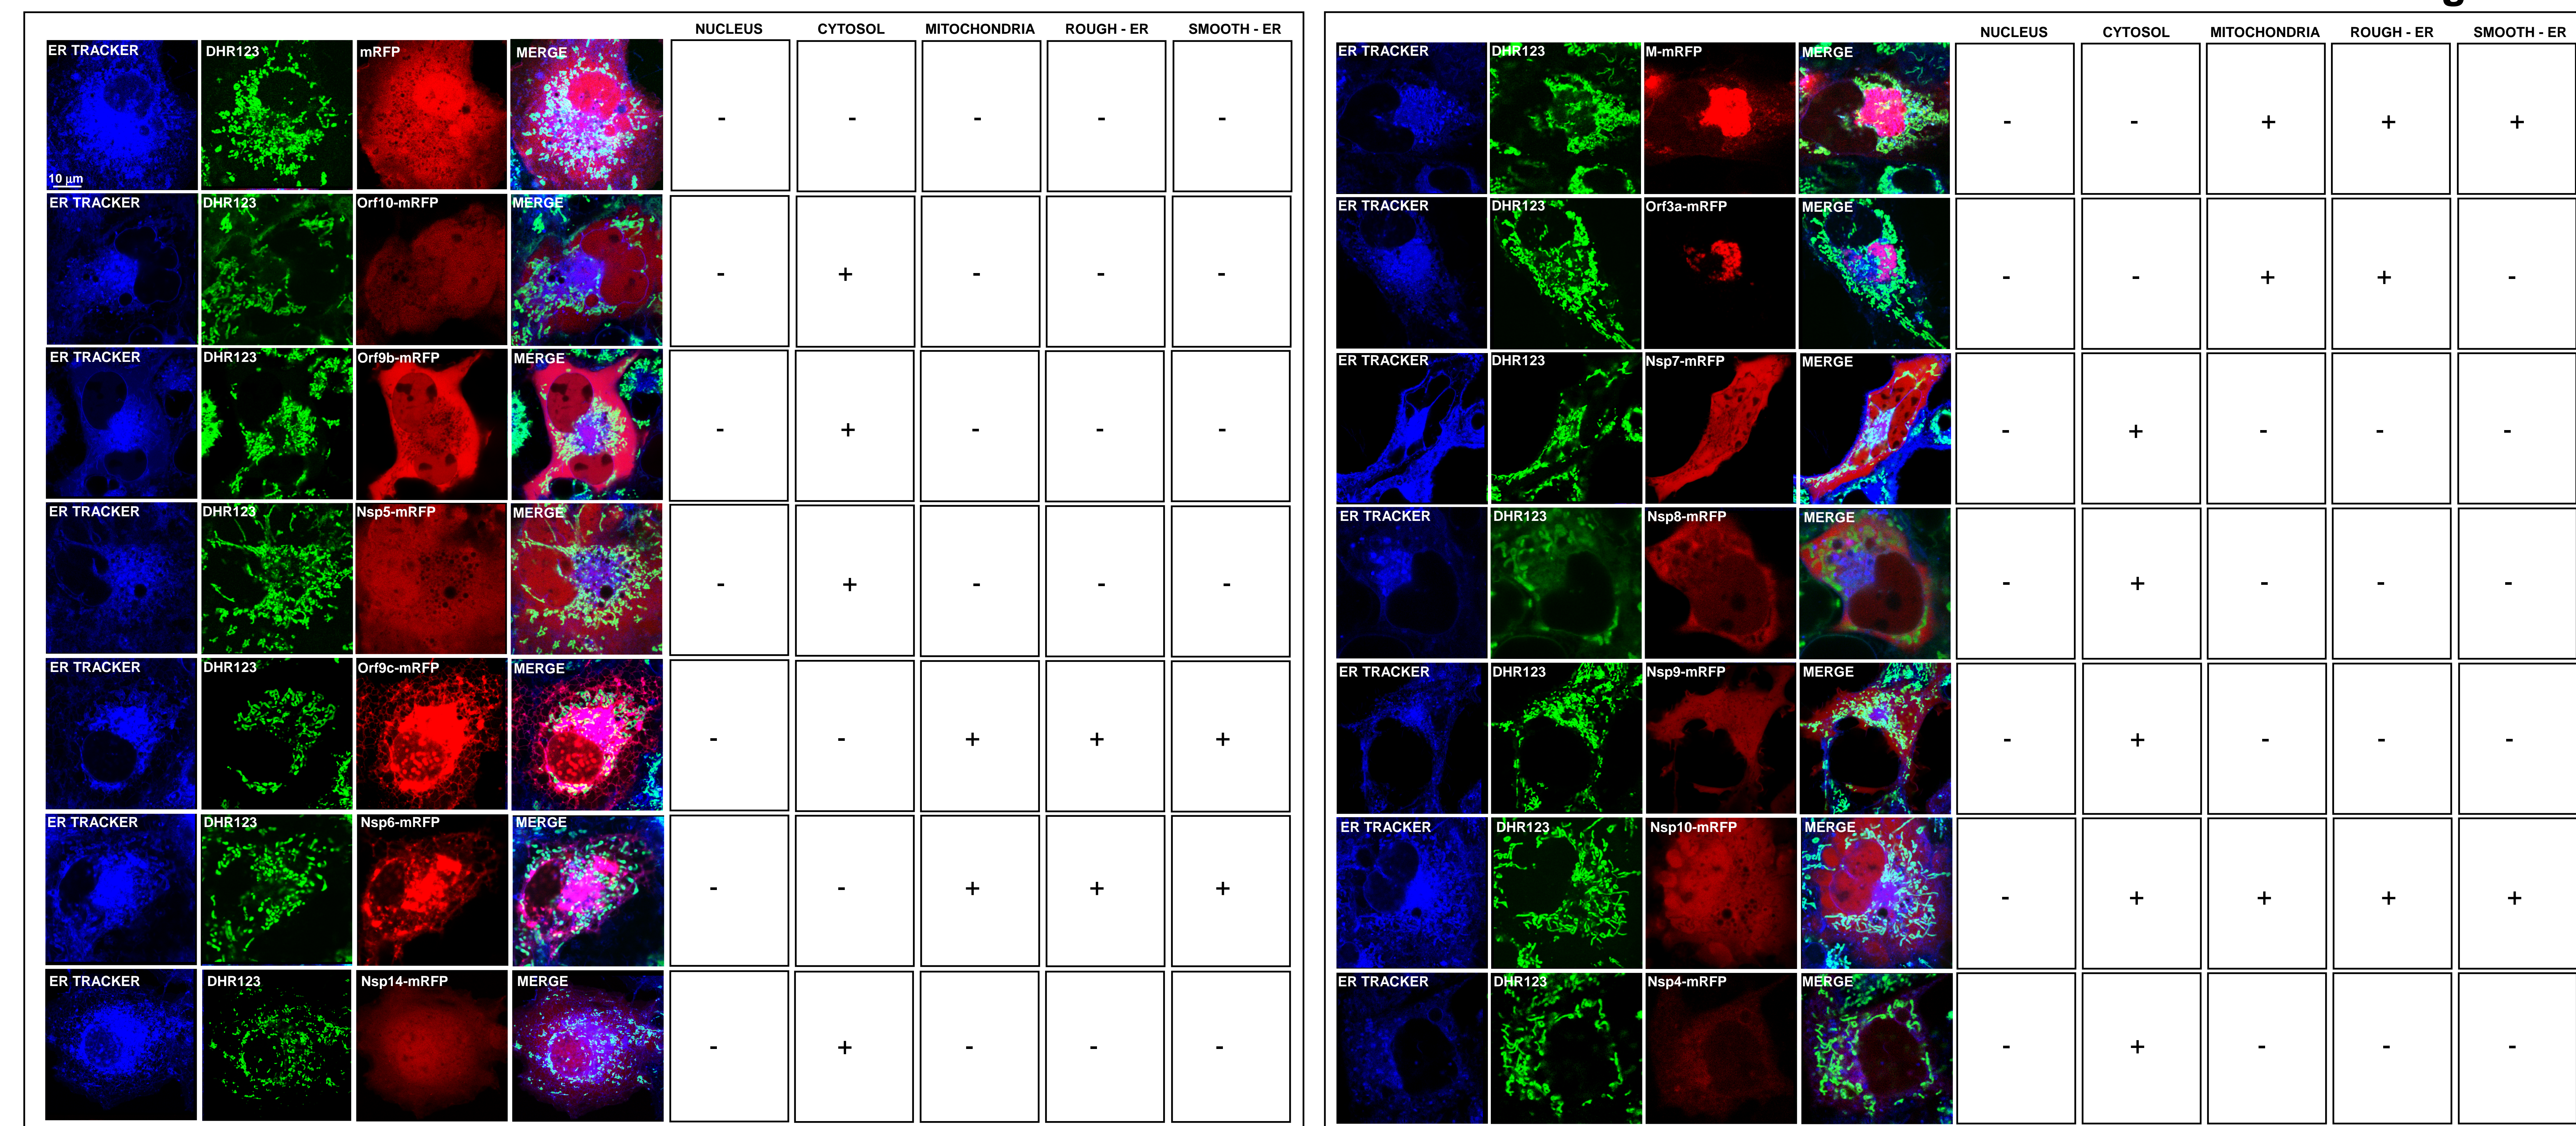

B

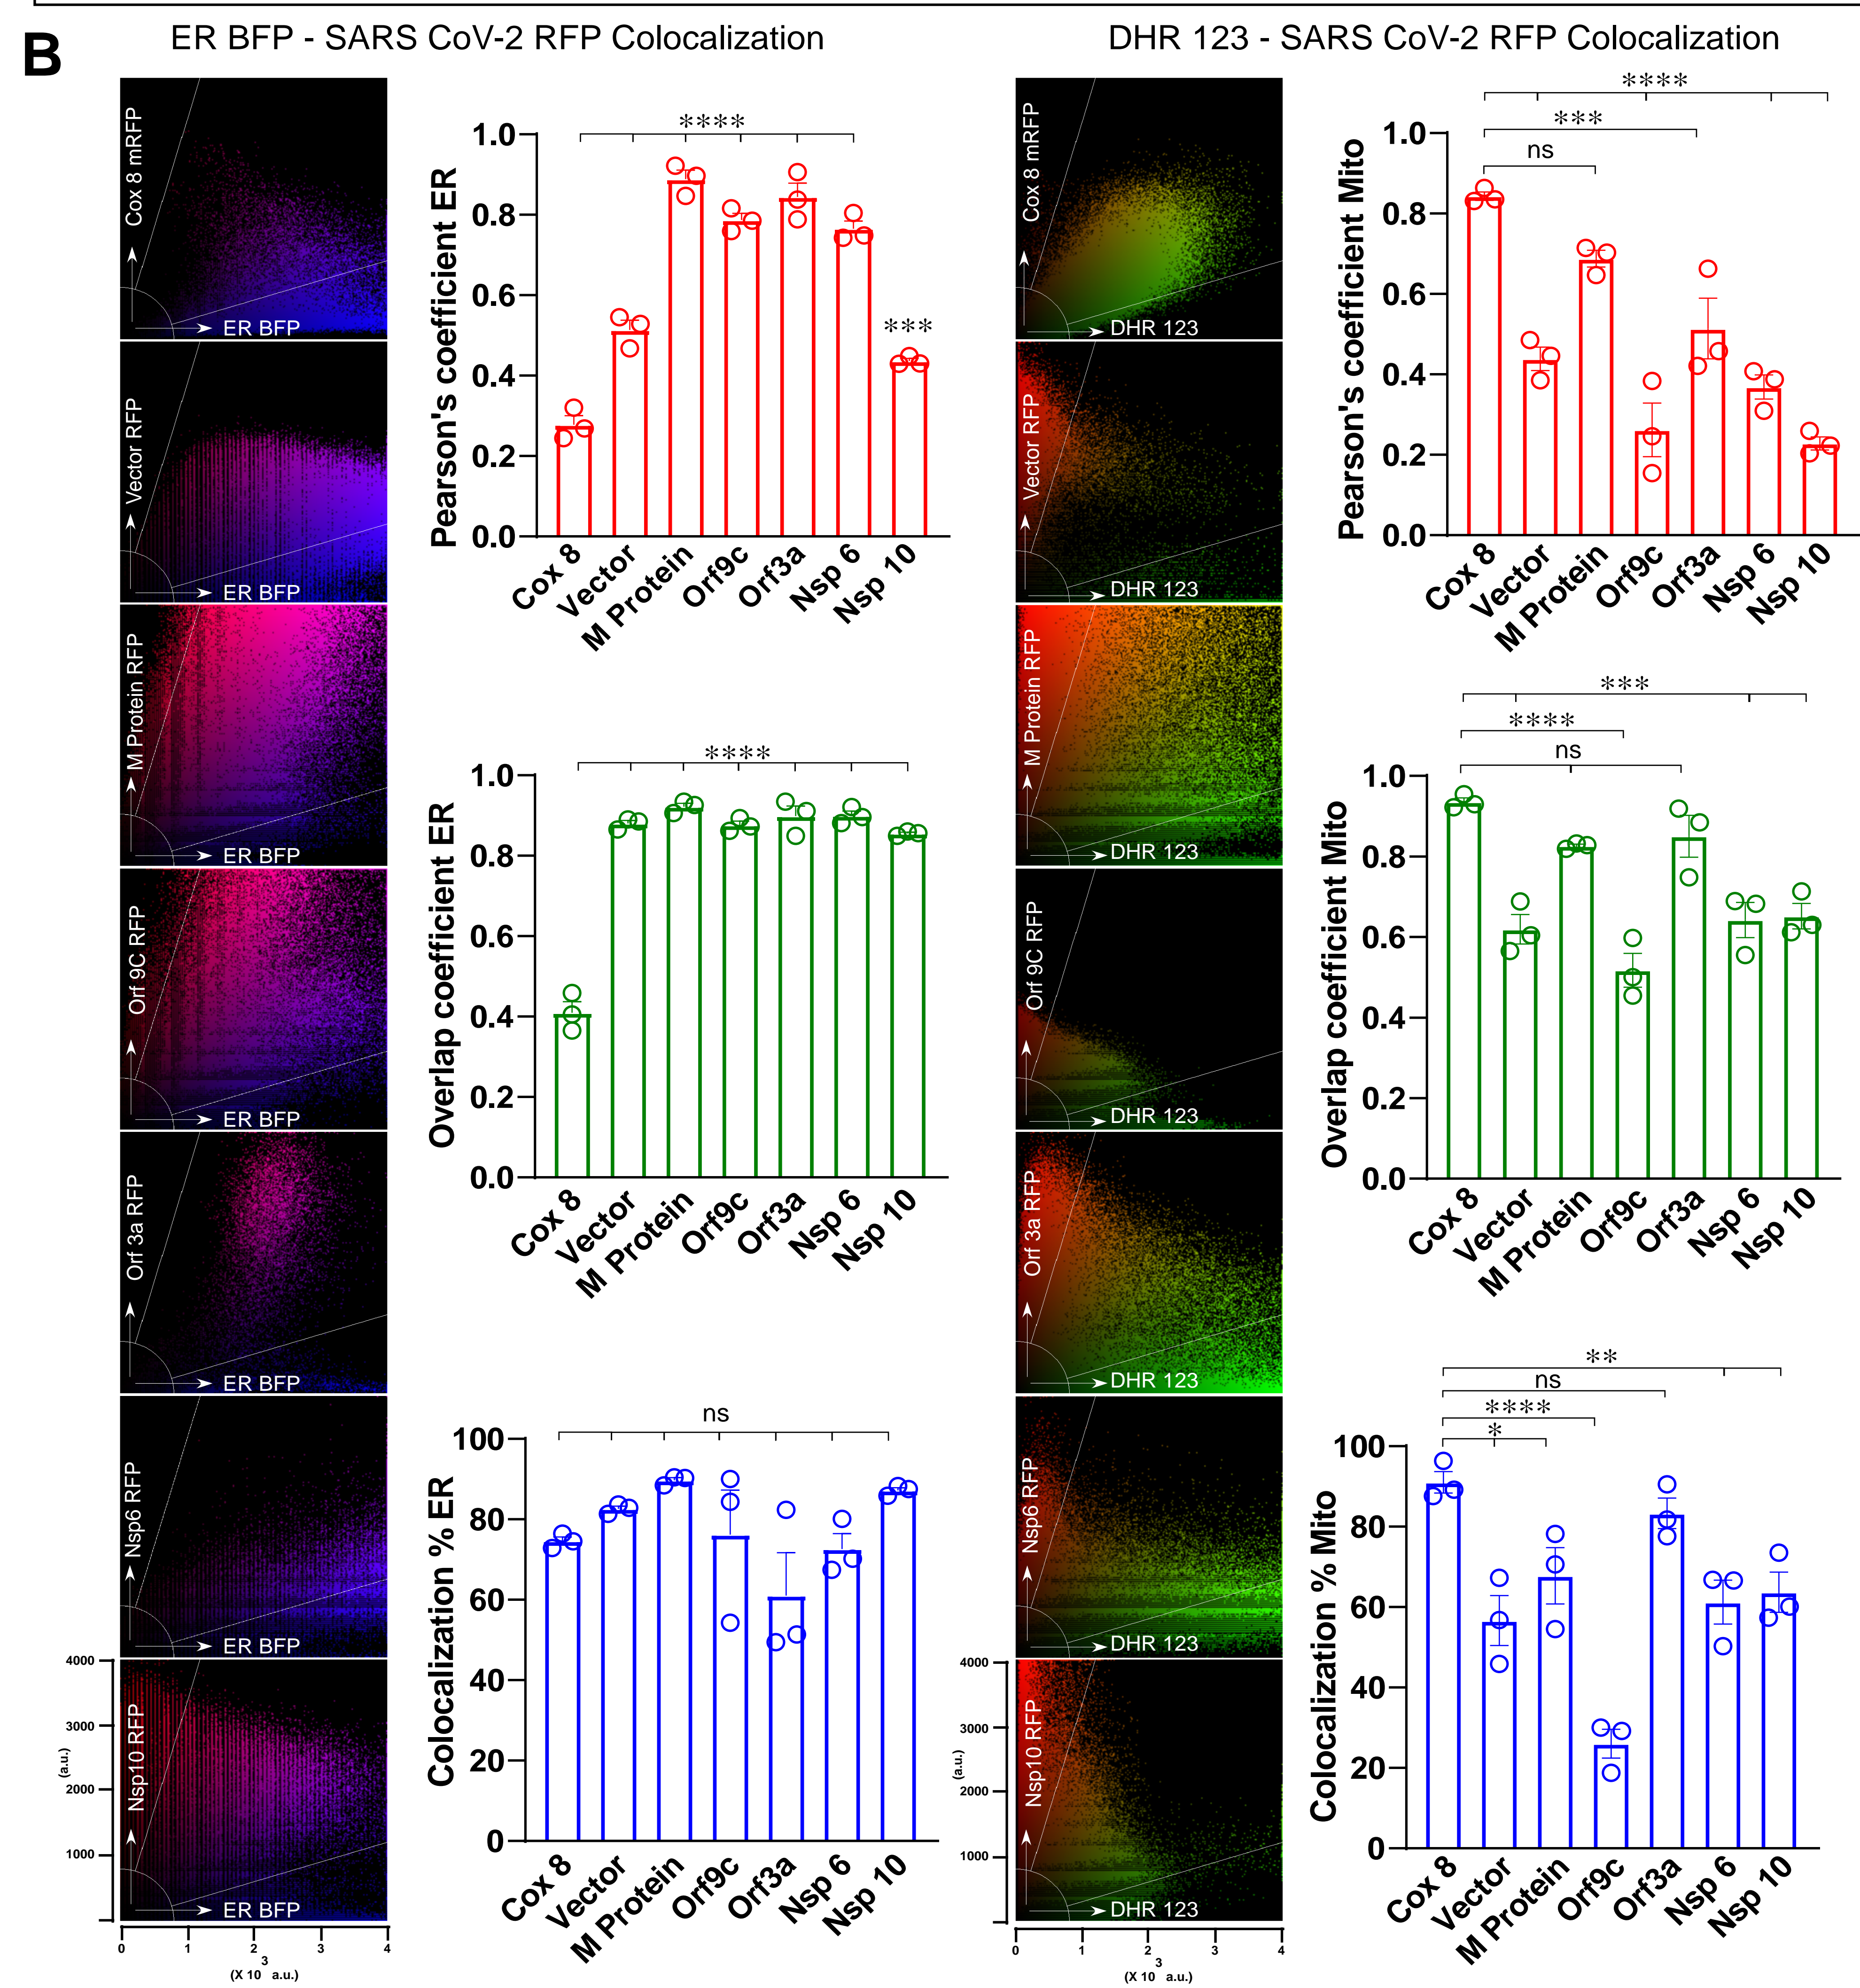



**Figure S1: Subcellular distribution of Sars-Cov-2 proteins in Cos-7 cells, Related to Figure 2.**

**(A).** Confocal images of COS-7 cells expressing mRFP-tagged SARS-CoV-2 plasmids constructs (Vector, NSP4, 5, 6, 7, 8, 9, 10, and 14, M Protein, ORF3a, ORF9b, ORF9c, and ORF10). 48 hours post transfection, cells were loaded ER tracker, and mitochondrial indicator (DHR123) and confocal live cell images were acquired. n=3 independent experiments.

**(B).** Colocalization analysis of SARS-CoV-2 proteins in COS-7 cells. n=3 independent experiments.

A

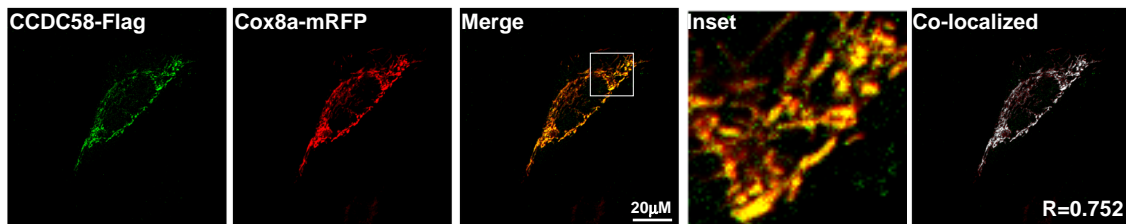

B

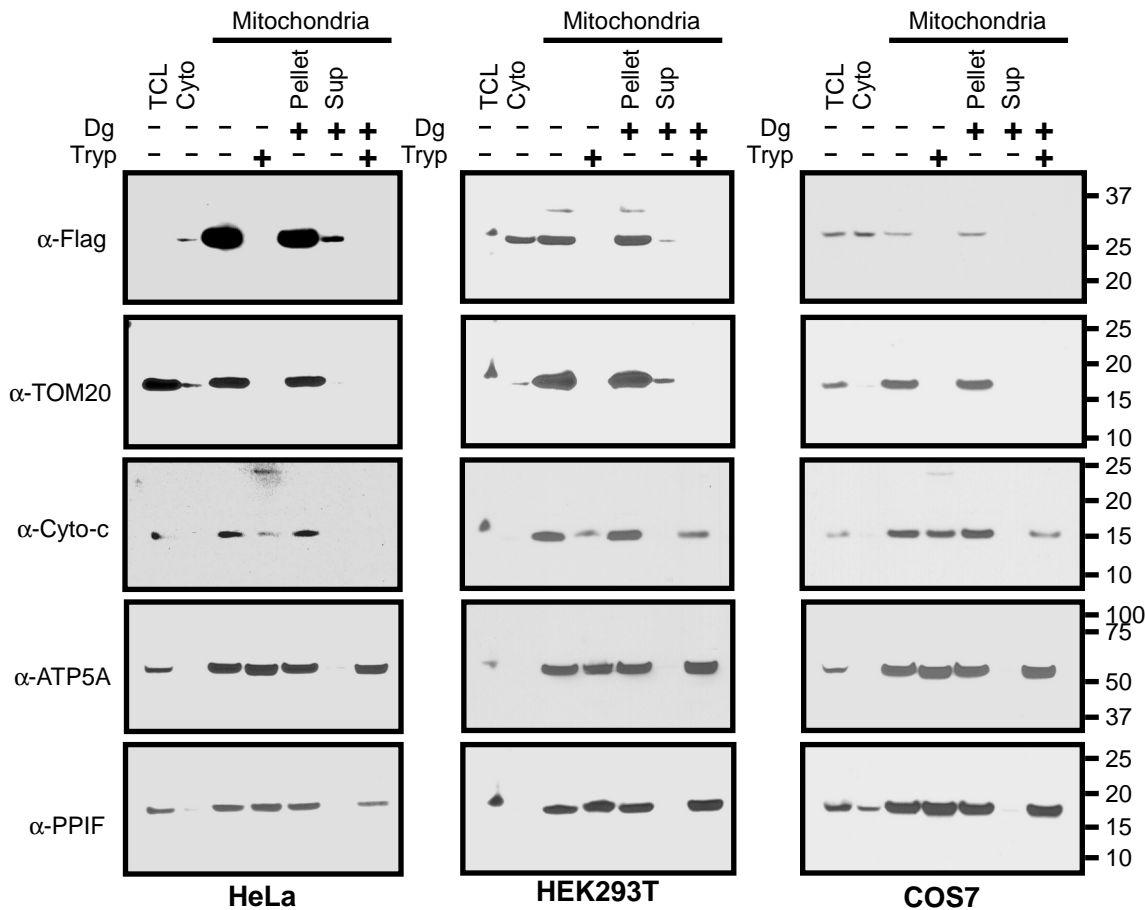

**Figure S2: Assessment of cellular and subcellular localization of CCDC58 in multiple cell types, Related to Figure 3**

**(A)** HeLa cells were transiently cotransfected with FLAG-tagged CCDC58 and mitochondrial marker COX8A-mRFP plasmid constructs. Immunofluorescence analysis of CCDC58 localization shows the mitochondrial localization.

**(B)** HeLa, HEK293T or COS-7 cells stably expressing FLAG-tagged CCDC58 were subjected to subcellular fractionation. CCDC58 distribution was assessed by Western blotting using appropriate protein markers.

# Figure S3

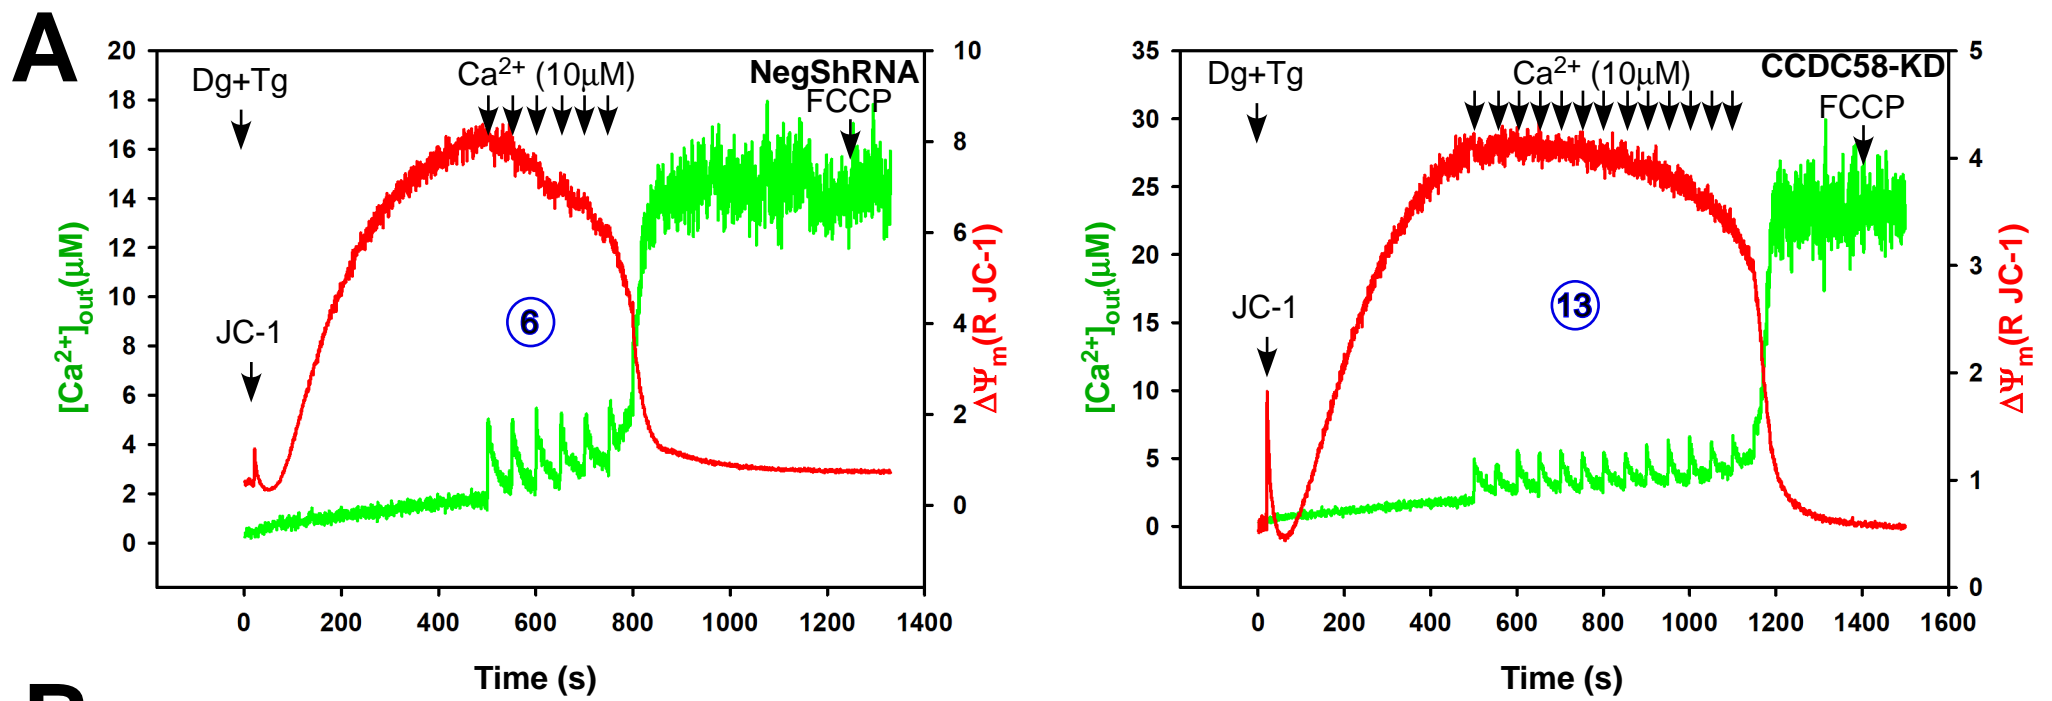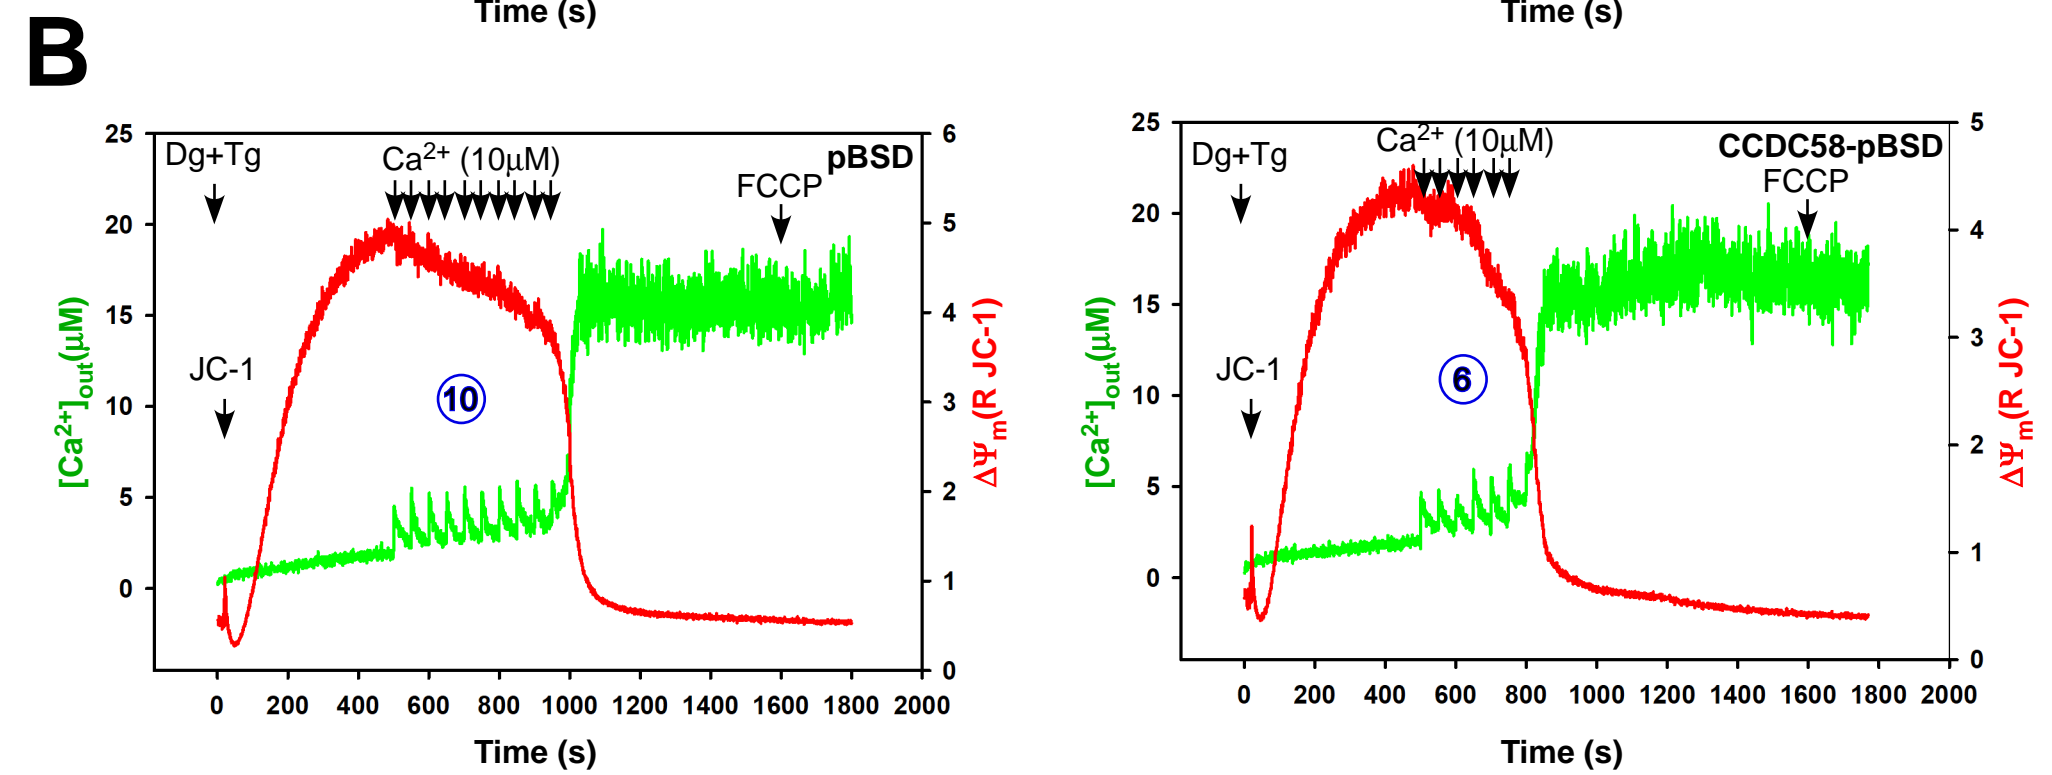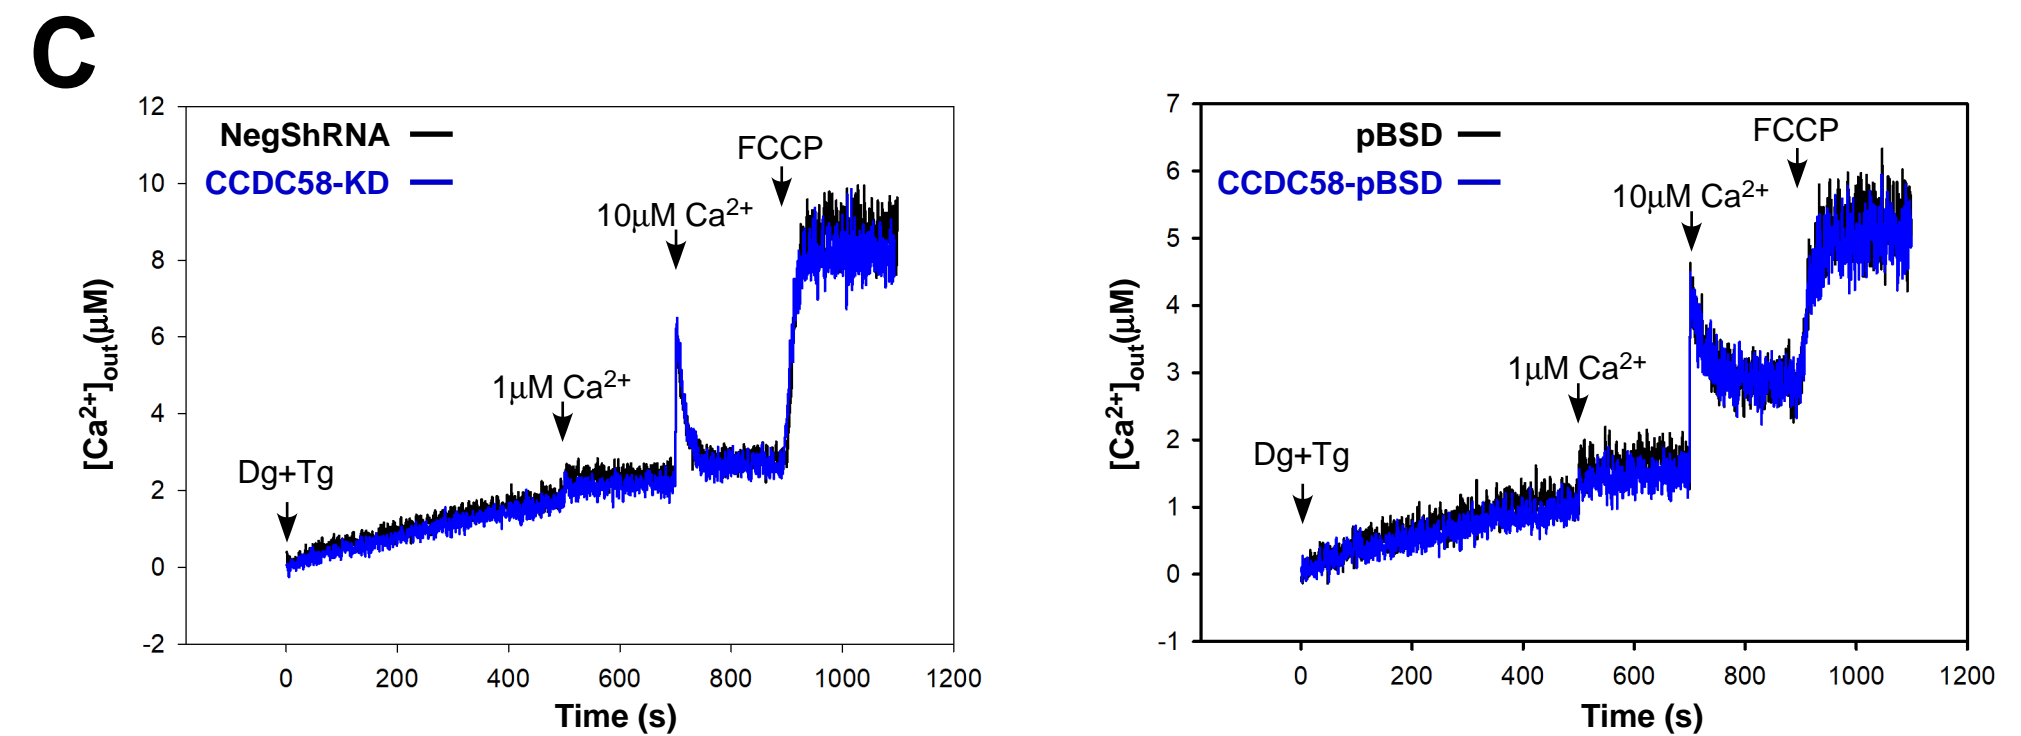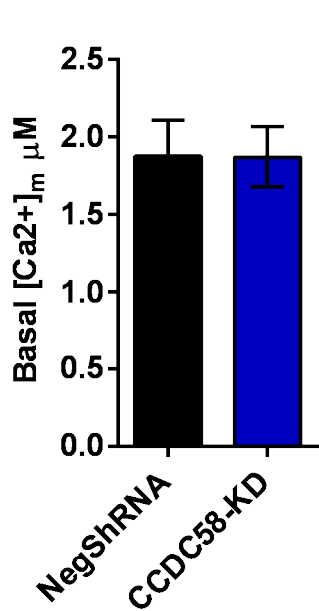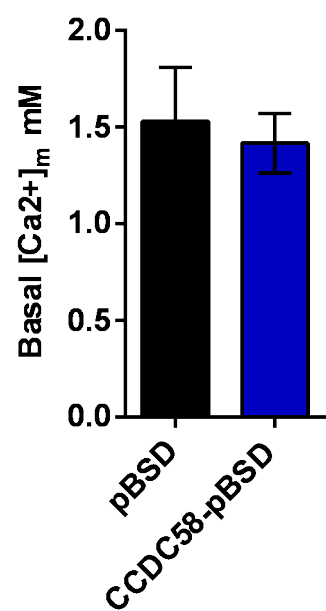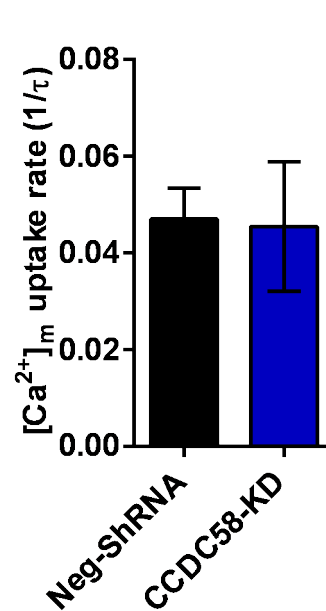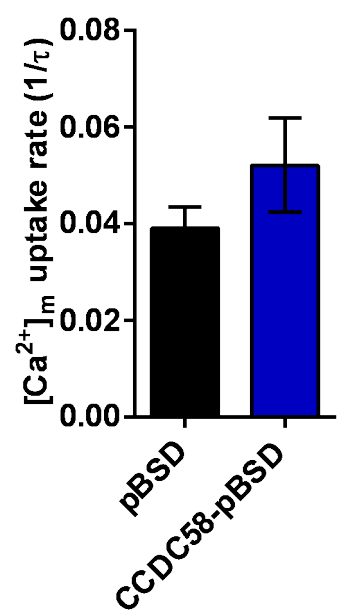

**Figure S3: Knockdown of CCDC58 enhances mitochondrial CRC without altering MCU-mediated Ca<sup>2+</sup> uptake, Related to Figure 3.**

**(A-B)** (A) Control, CCDC58 KD, (B) vector alone (pBSD) or CCDC58 overexpressing HeLa cells were permeabilized and mitochondrial CRC was measured.

**(C)** Control, CCDC58 KD, vector alone or CCDC58 overexpressing HeLa cells were permeabilized and basal and MCU activity rate were calculated.

# Figure S4

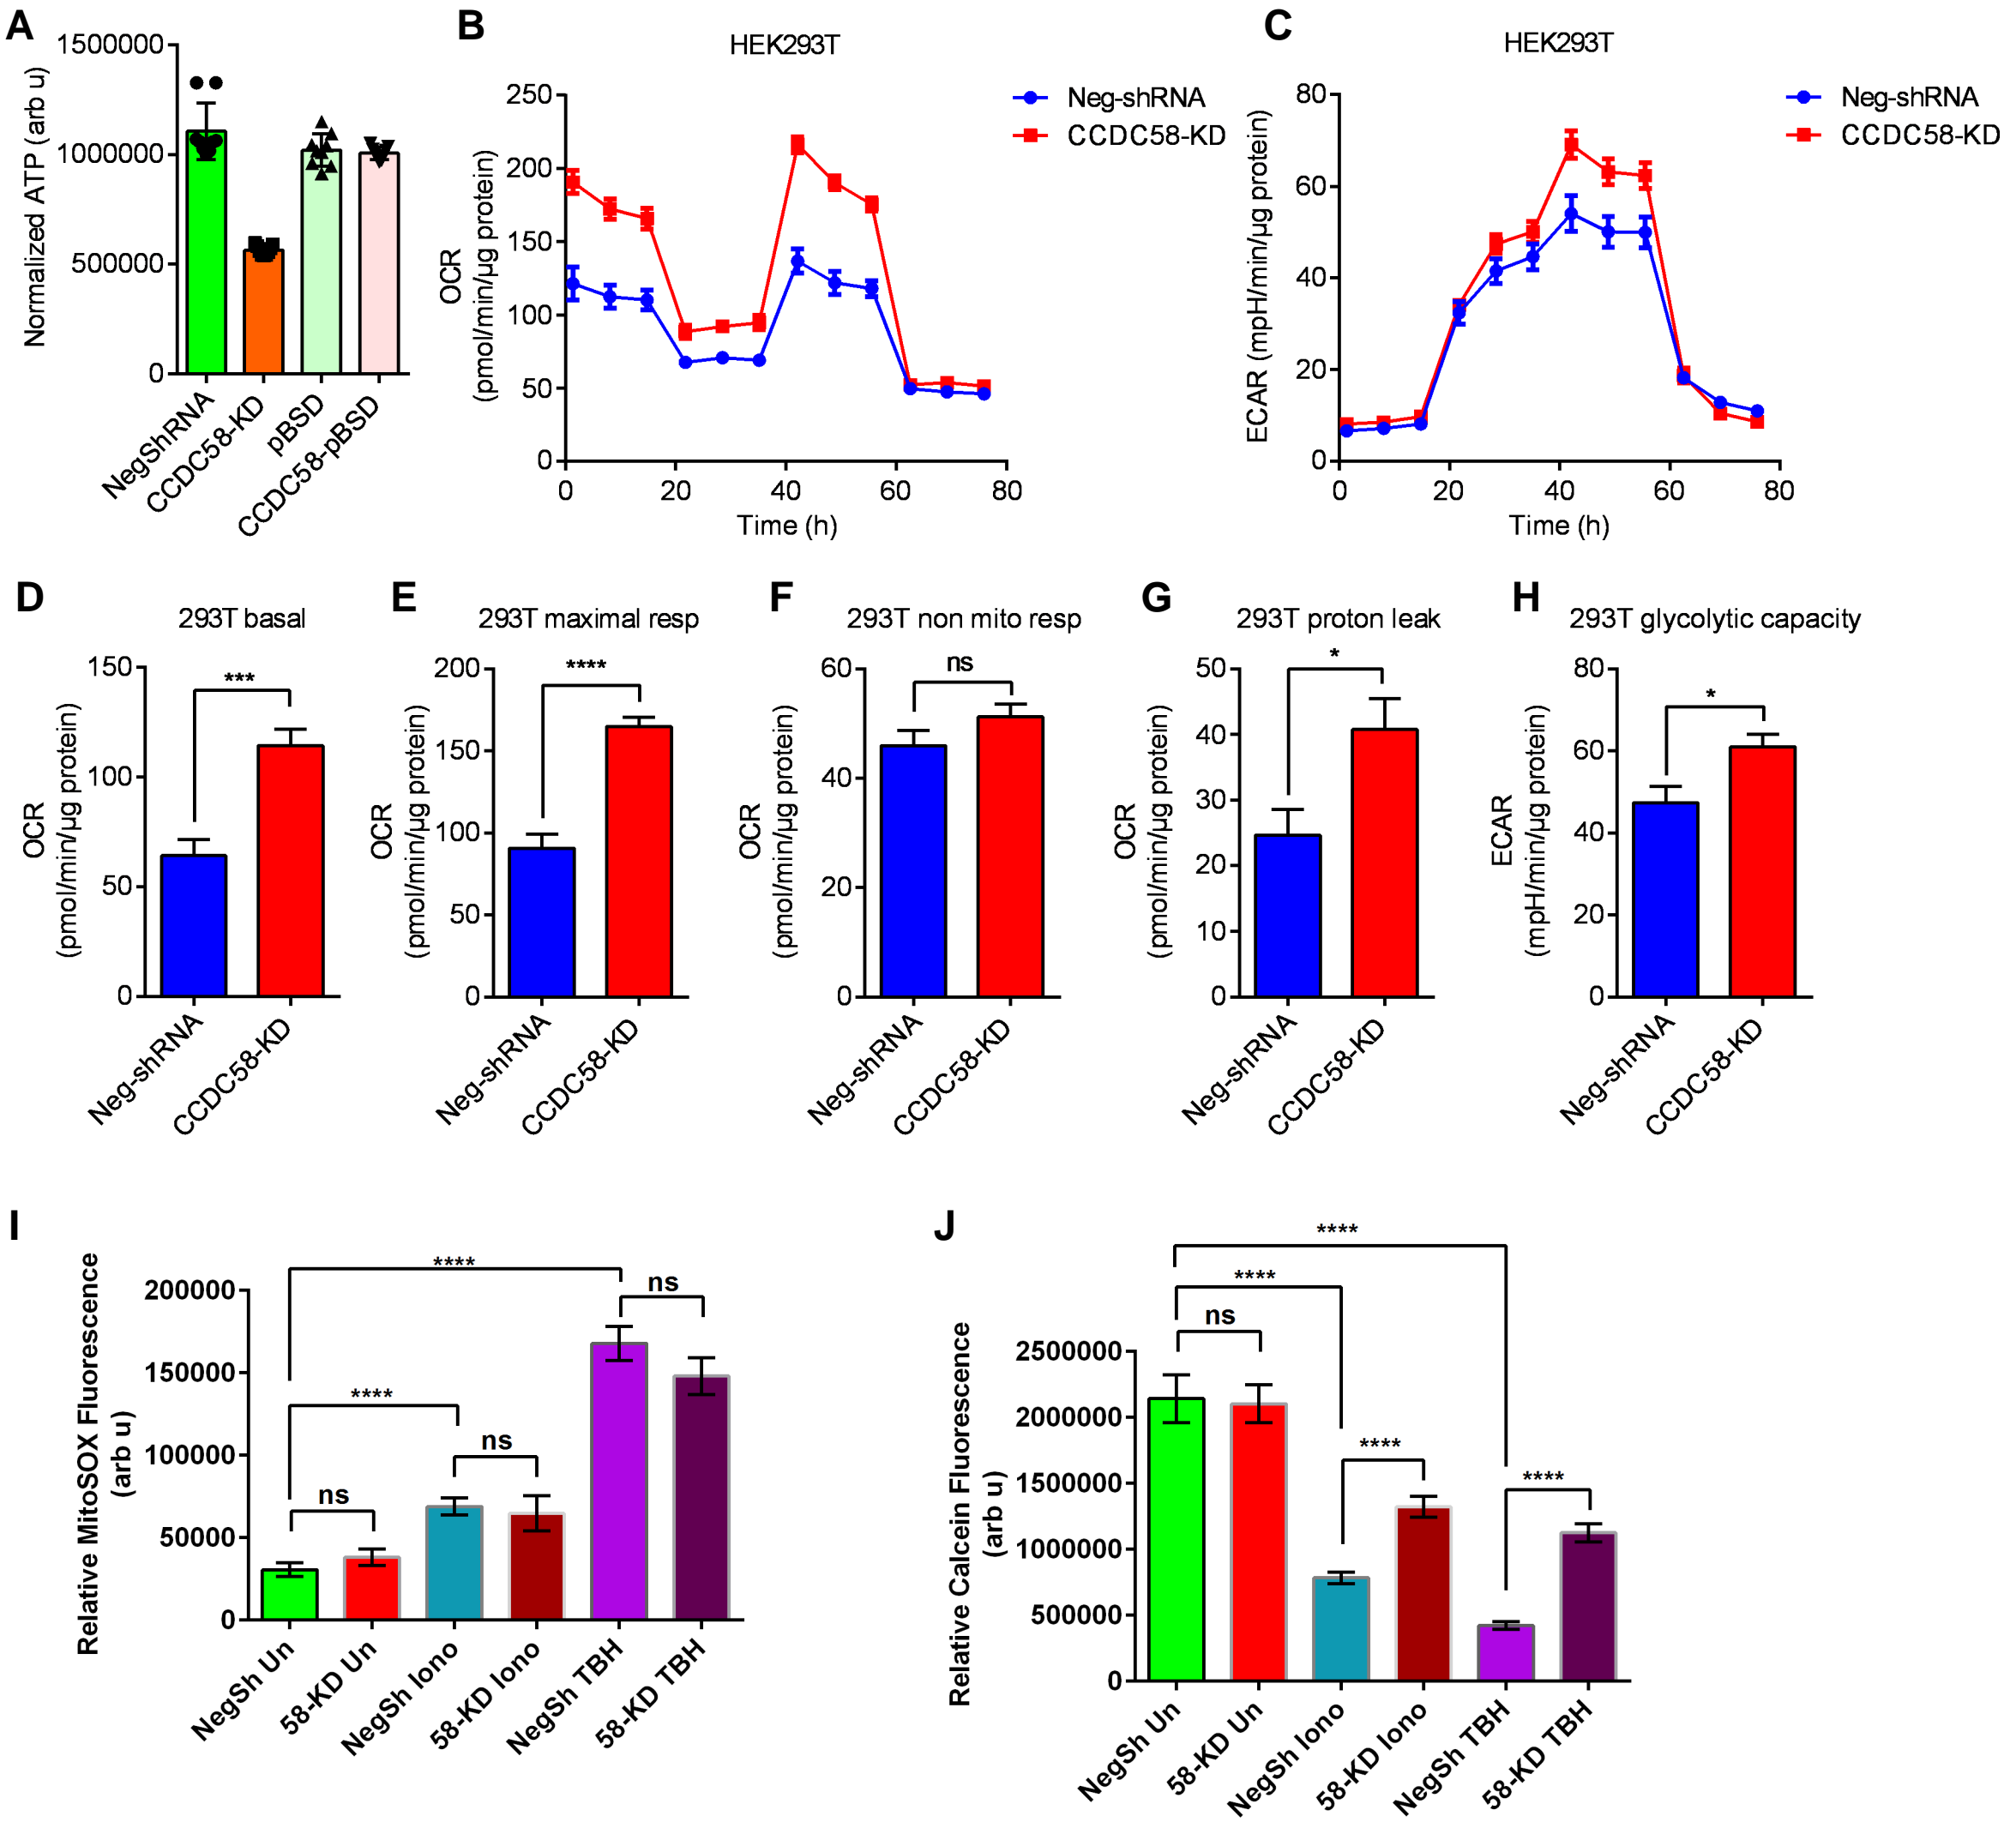

**Figure S4: Assessment of cellular ATP and mitochondrial OCR, mitochondrial ROS production, and calcein retention of CCDC58 KD cells following exposure to stress conditions, Related to Figure 3.**

**(A)** Measurement of cellular ATP levels. Mean  $\pm$  SEM, n = 5-7 independent experiments.

**(B and C)** Measurement of OCR and ECAR of CCDC58 KD cells. Mean  $\pm$  SEM, n = 5-7 replicates.

**(D-H)** Analysis of basal, maximal, non-mito OCR, proton leak, and glycolytic capacity. Data are presented as the mean  $\pm$  SEM, n = 3-4 independent experiments. \* $p < 0.05$ , \*\*\* $p < 0.001$ , \*\*\*\* $p < 0.0001$ , n.s., not significant.

**(I)** Measurement of mitochondrial MitoSOX red fluorescence with or without ionomycin and t-BH challenge for 60 min. Data are presented as the mean  $\pm$  SEM, n = 3-5 independent experiments. \*\*\*\* $P < 0.0001$ , n.s., not significant.

**(J)** Measurement of Calcein retention following ionomycin or t-BH challenge for 4 hours. Data are presented as the mean  $\pm$  SEM, n = 3-4 independent experiments. \*\*\*\* $P < 0.0001$ , n.s., not significant.



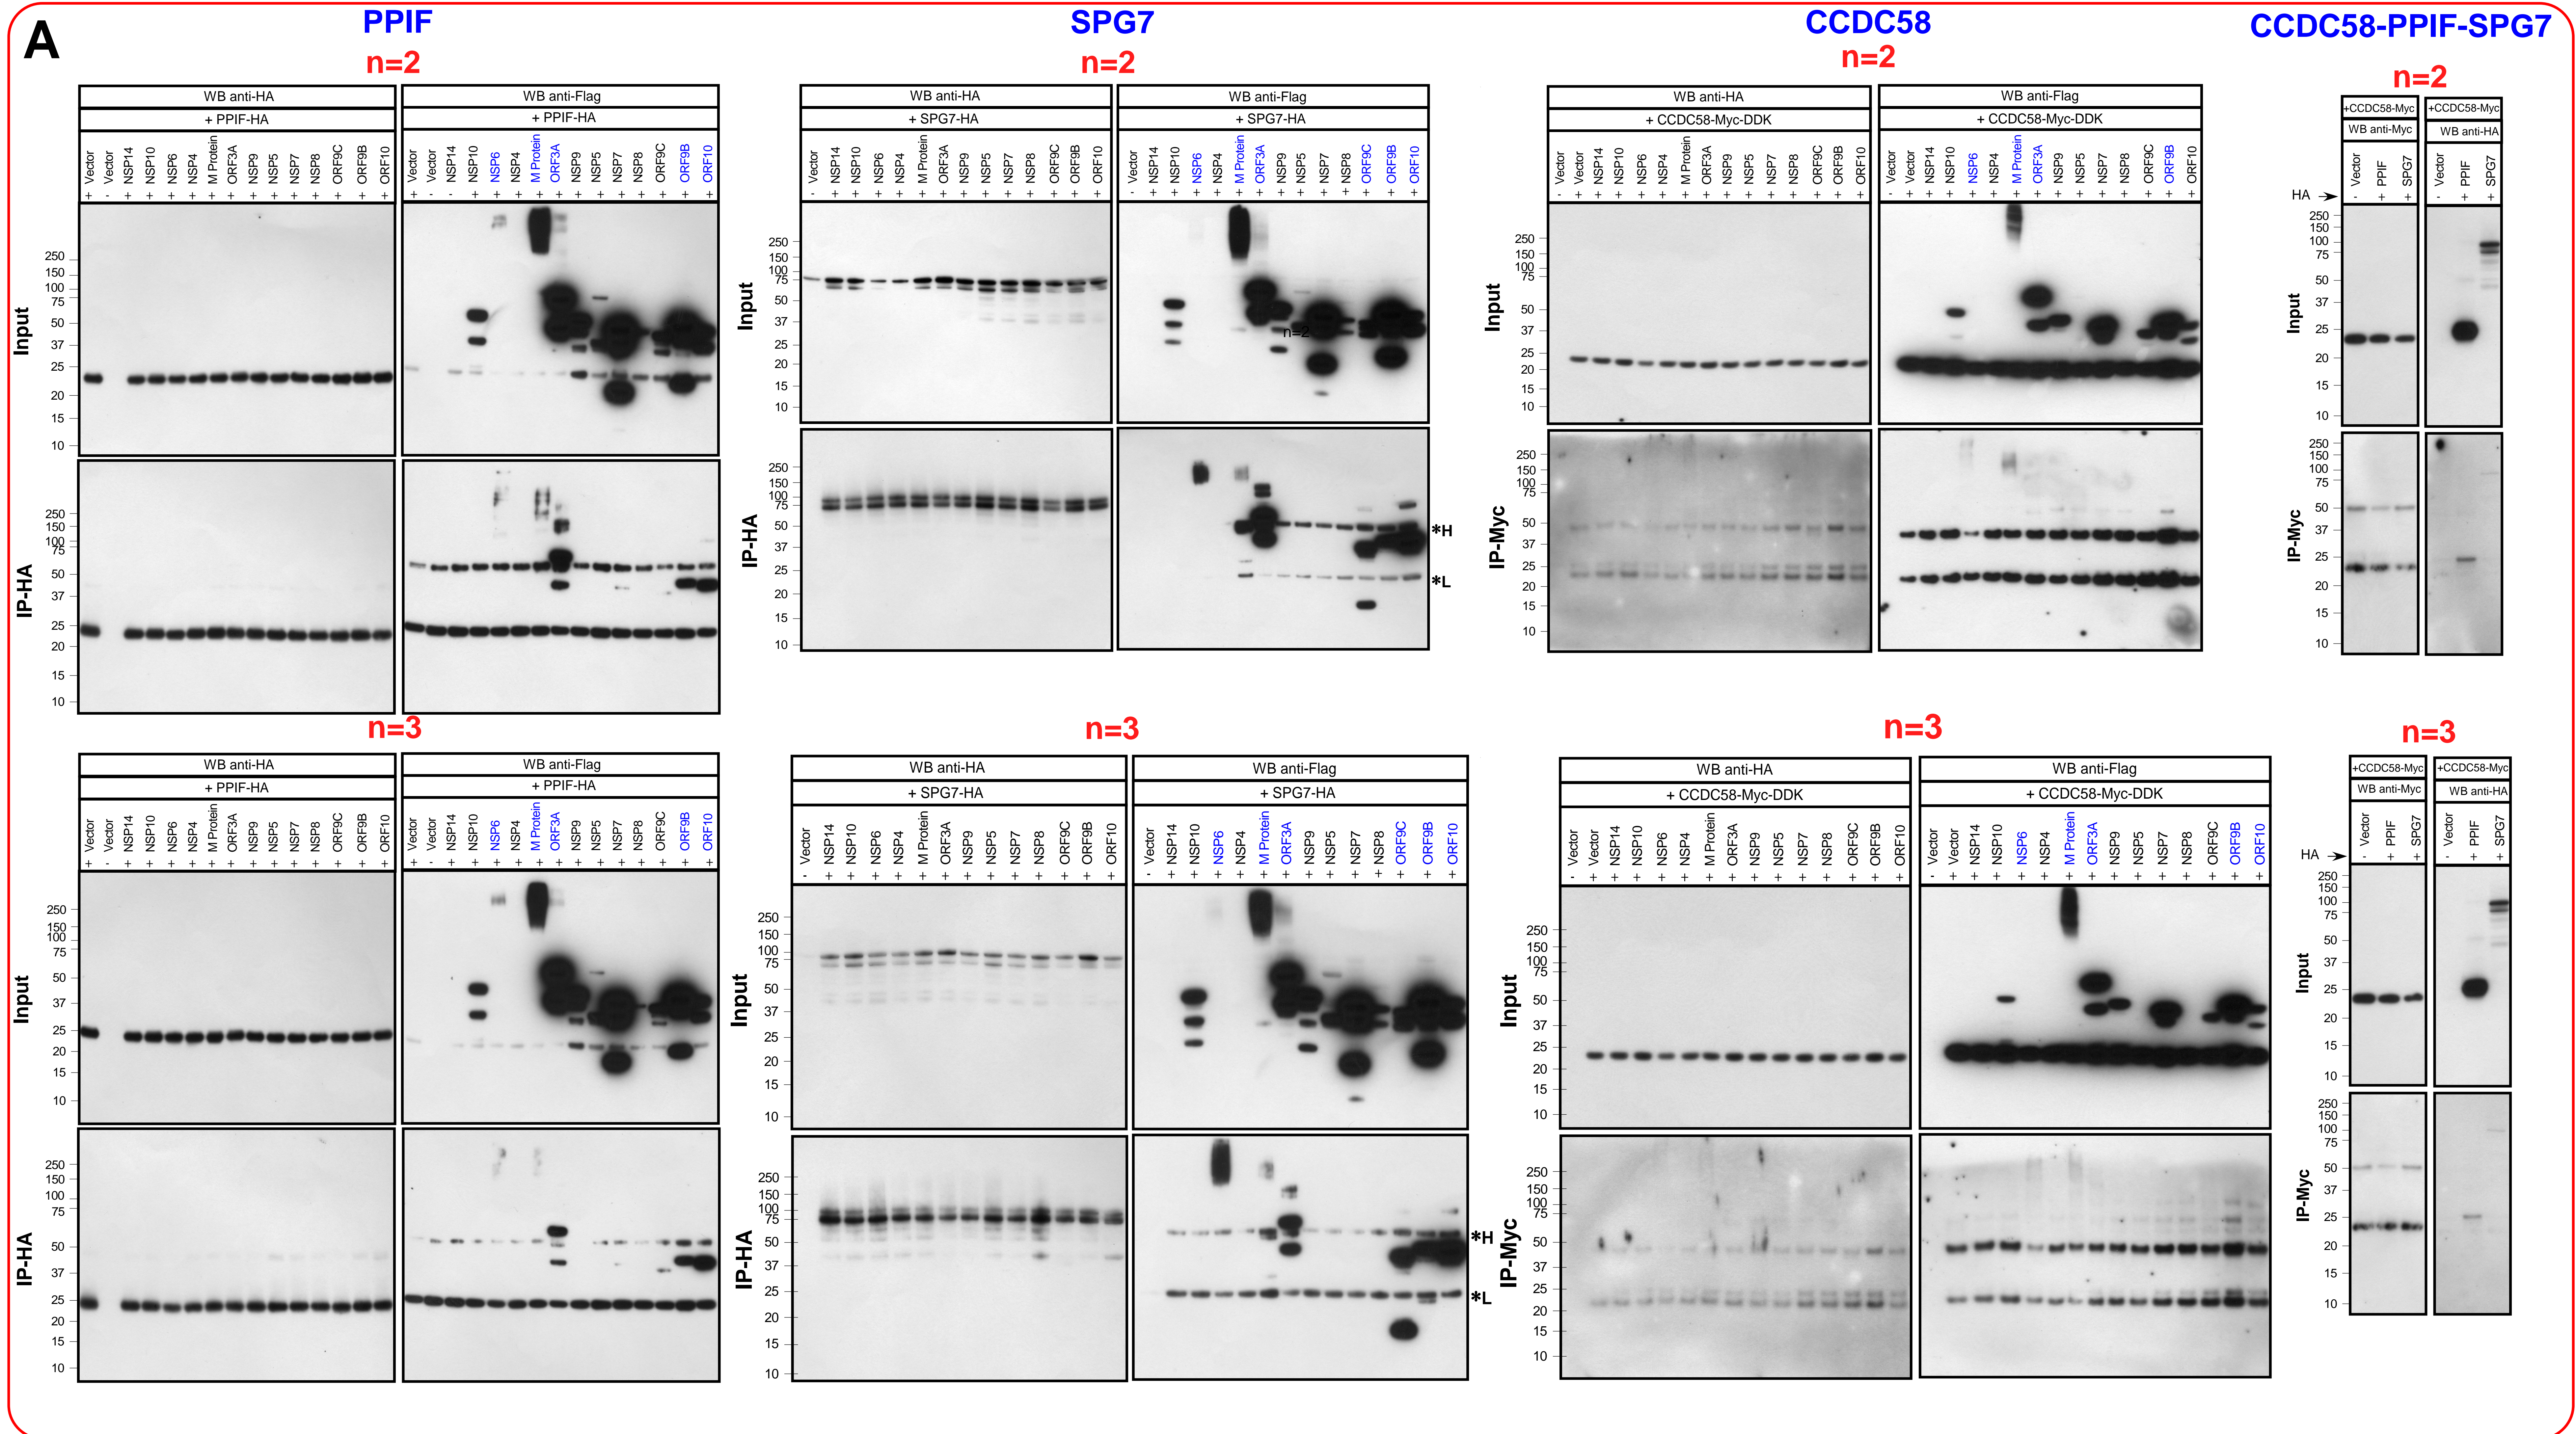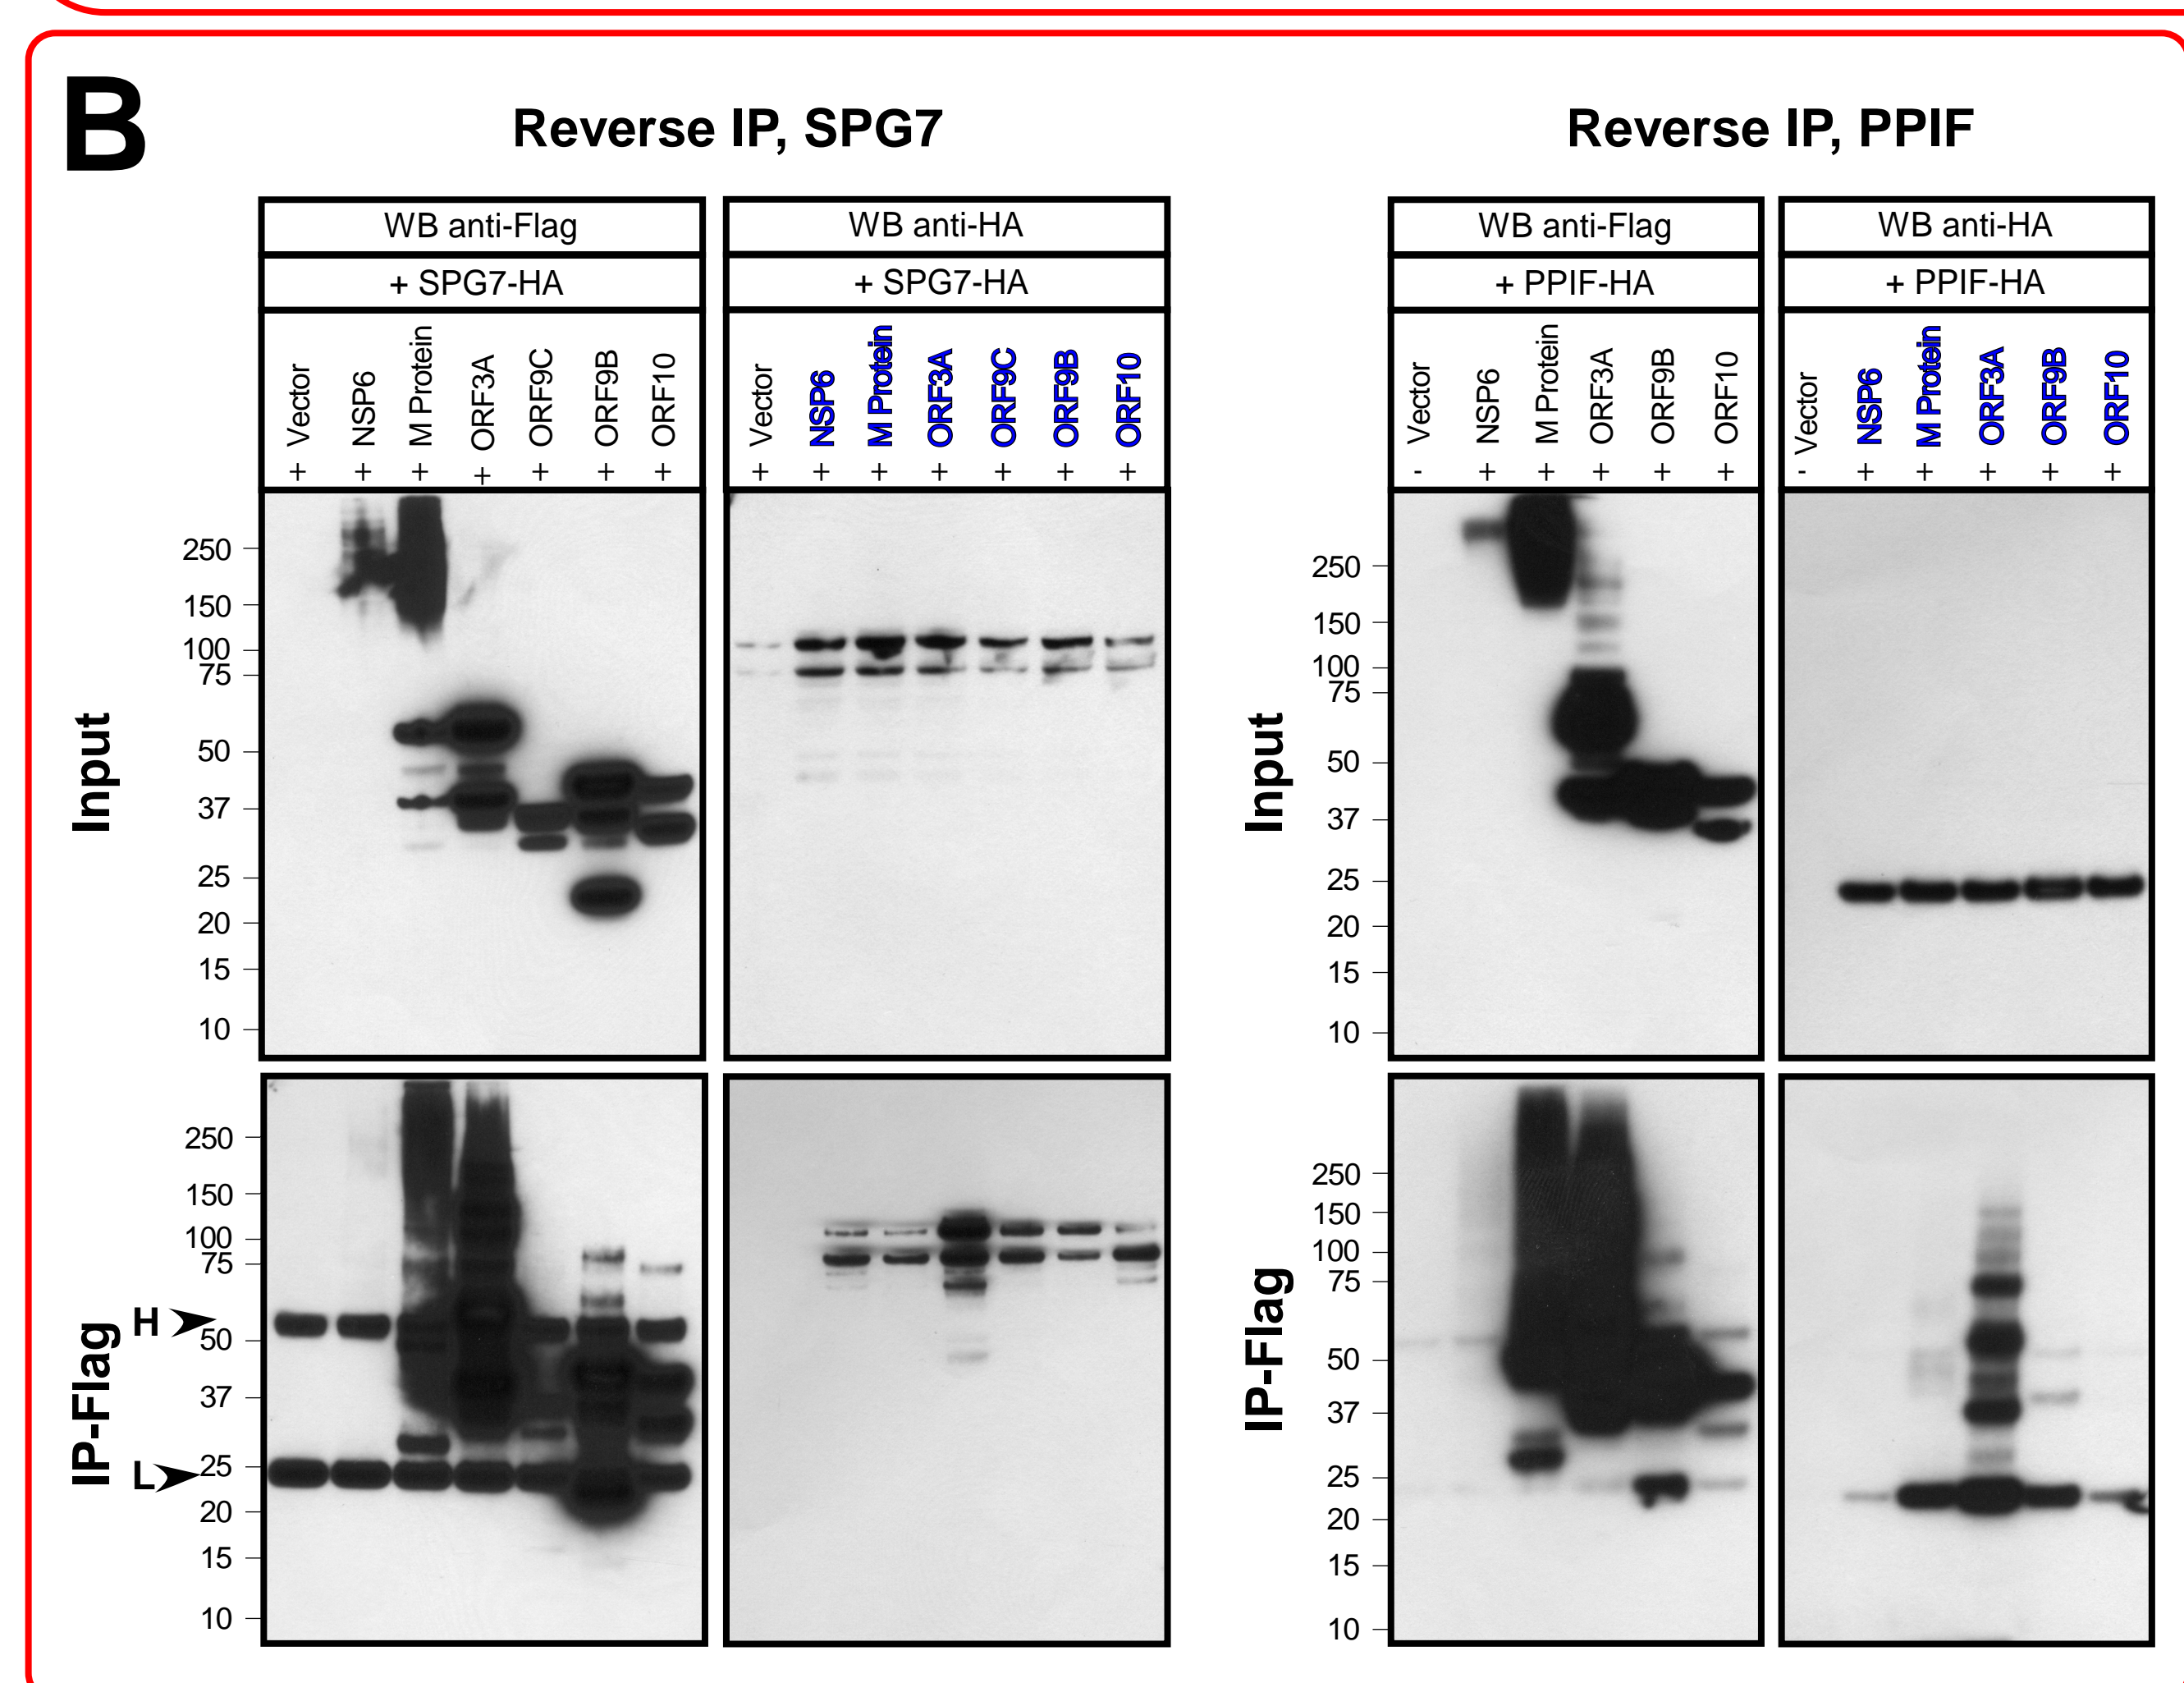



**Figure S5. SARS-CoV-2 proteins interact with mitochondrial PTP complex,  
Related to Figure 4.**

**(A)** COS-7 cells were cotransfected with HA-tagged PPIF and FLAG-tagged SARS-CoV-2 protein plasmid constructs. Following immunoprecipitation with HA antibody, total cell lysates and immunoprecipitated materials were subjected to Western blot analysis. Cell lysates were probed with anti-FLAG or anti-HA antibodies. Immunoprecipitated samples were probed with anti-FLAG (top right) and anti-HA antibodies (bottom right). Western blot analysis of cell lysates (left) or immunoprecipitates (right) from COS-7 cells coexpressing HA-tagged SPG7 and FLAG-tagged SARS-CoV-2 protein plasmid constructs. Western blot analysis of cell lysates (left) or immunoprecipitates (right) from COS-7 cells coexpressing Myc-tagged CCDC58 and FLAG-tagged SARS-CoV-2 protein plasmid constructs. n = 3.

**(B)** Reverse IP analysis of (A) for SARS-CoV-2 proteins and Mitochondrial PTP Complex interactions.

A

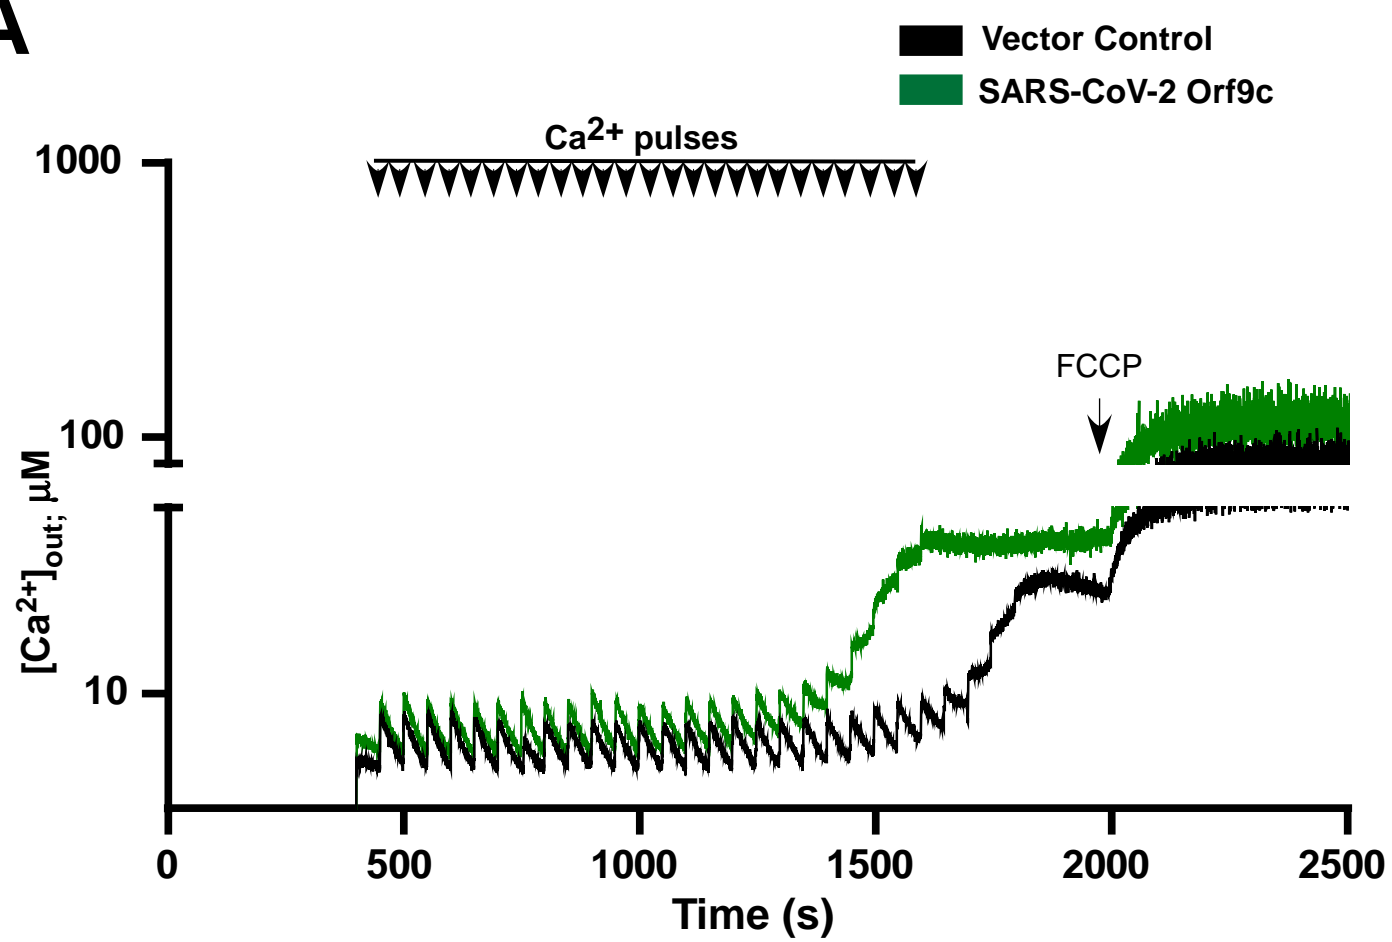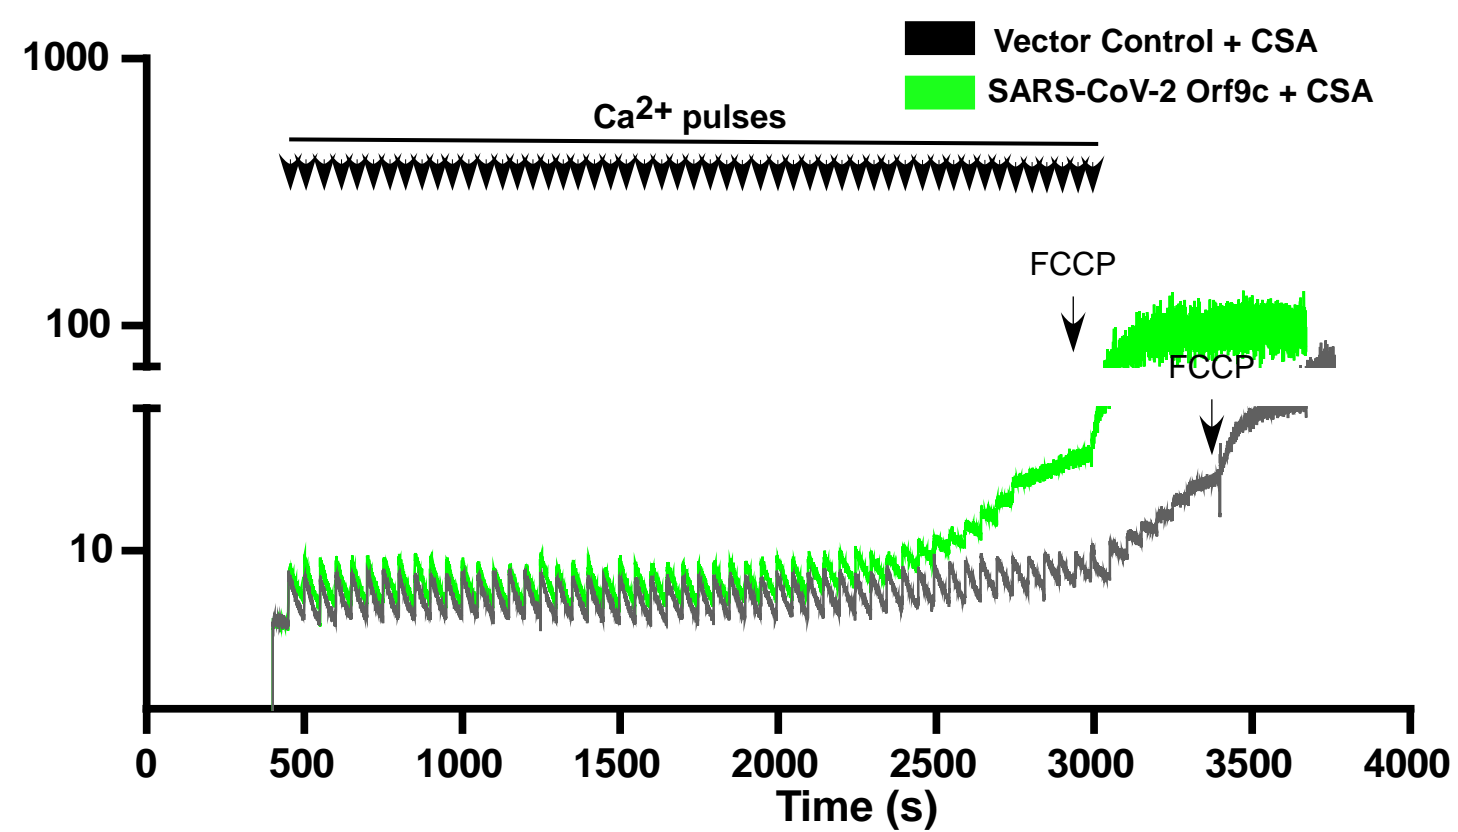

B

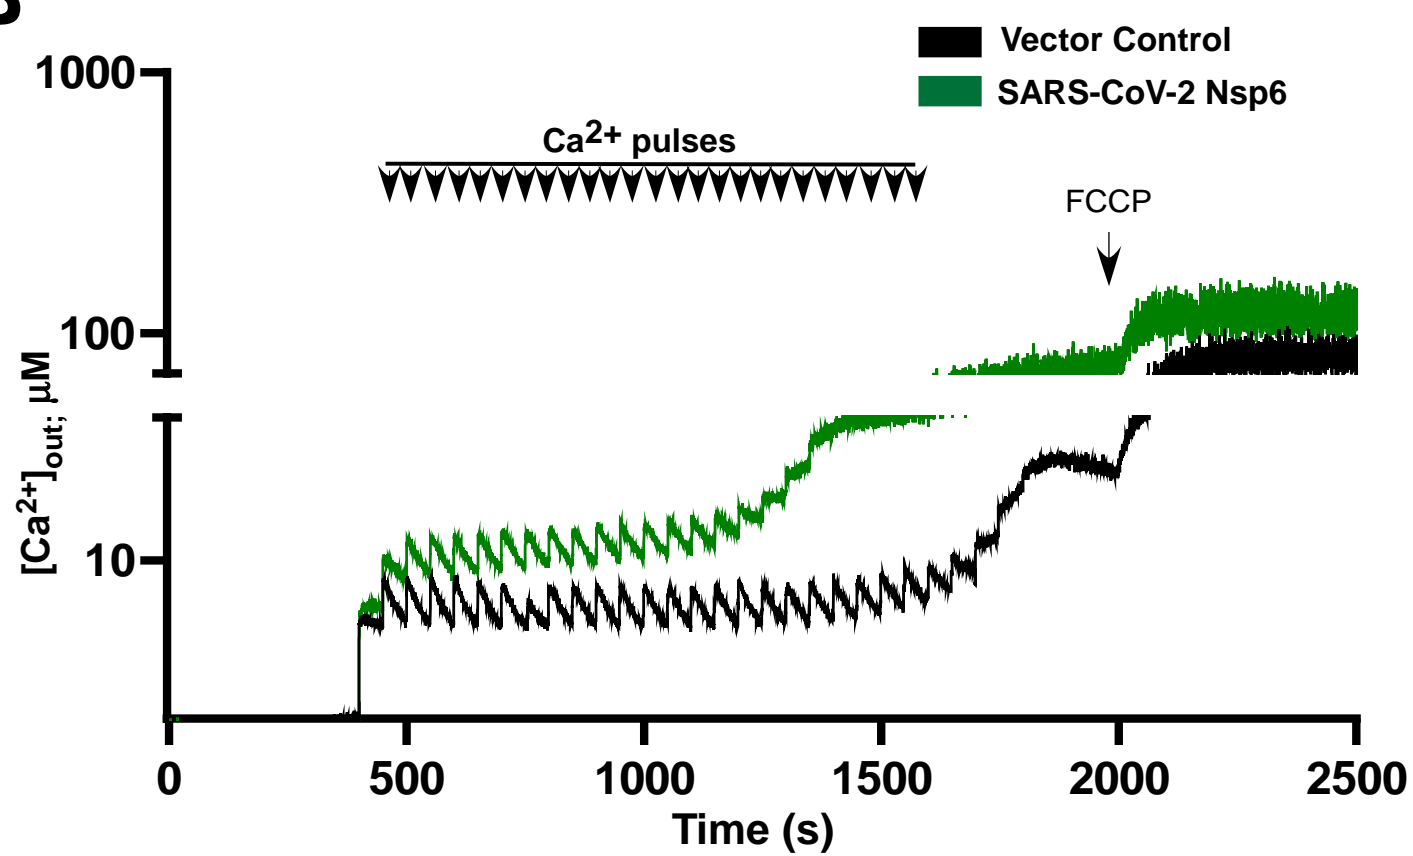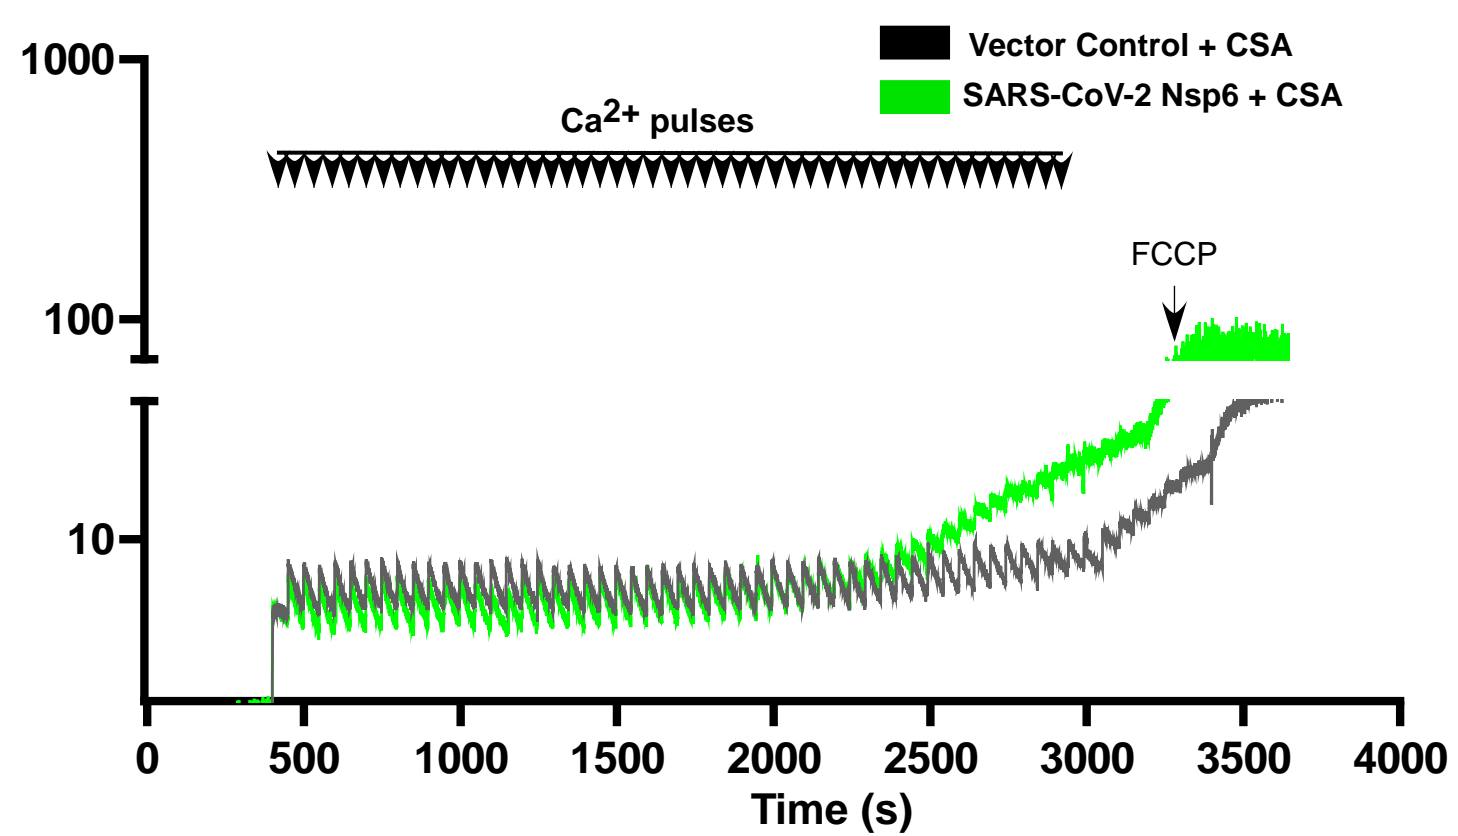

C

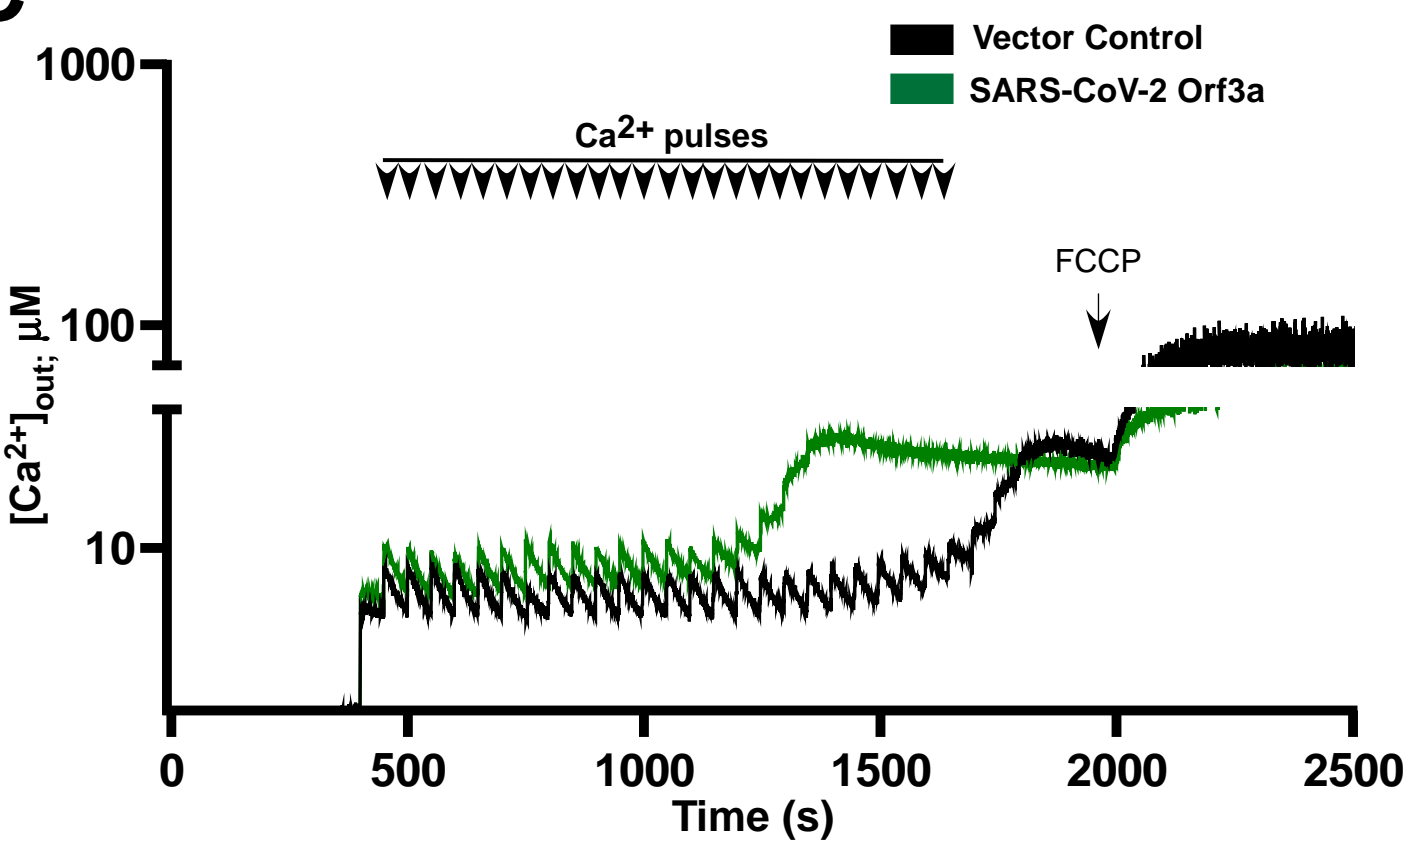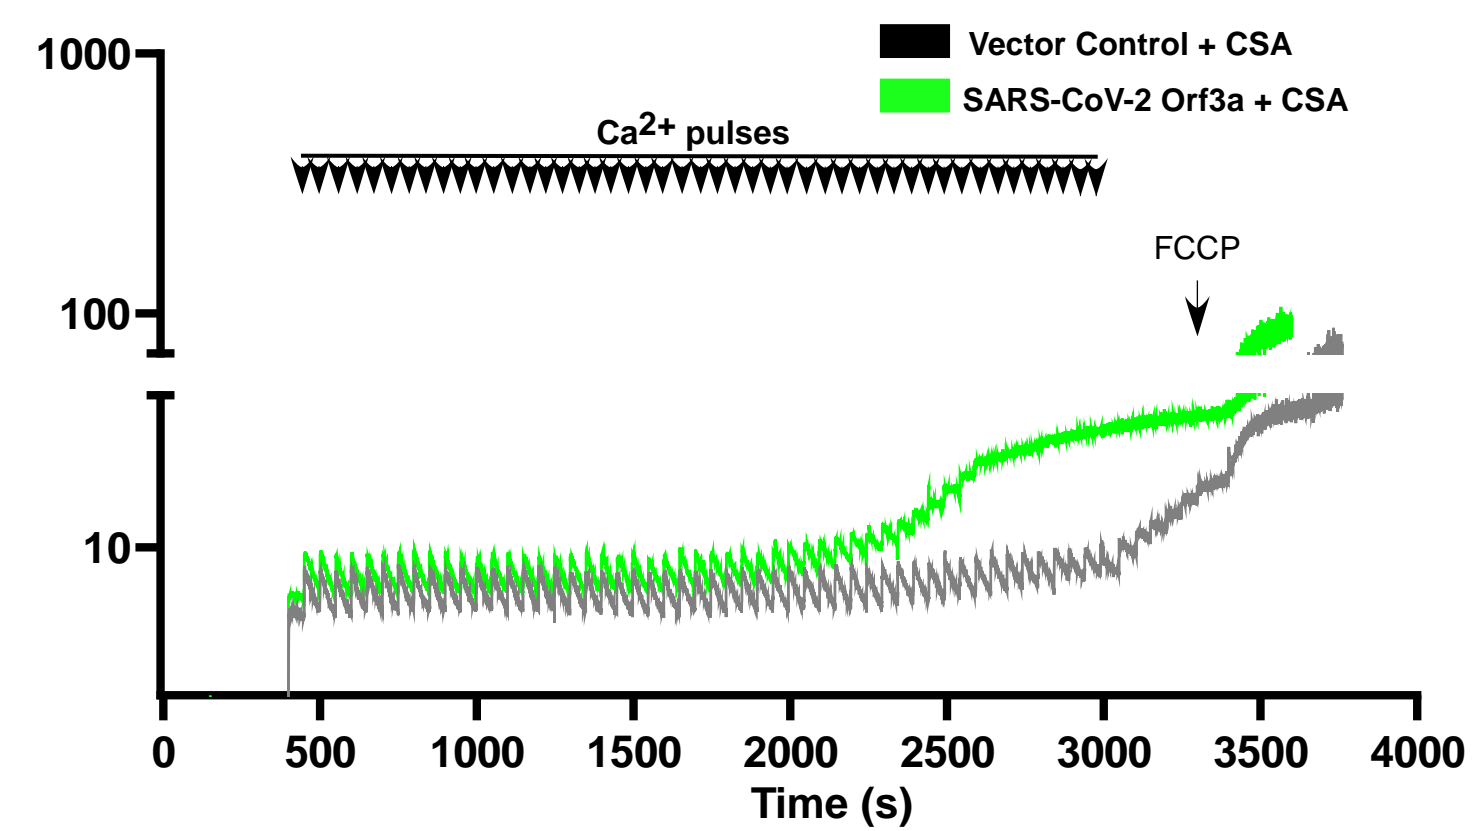

D

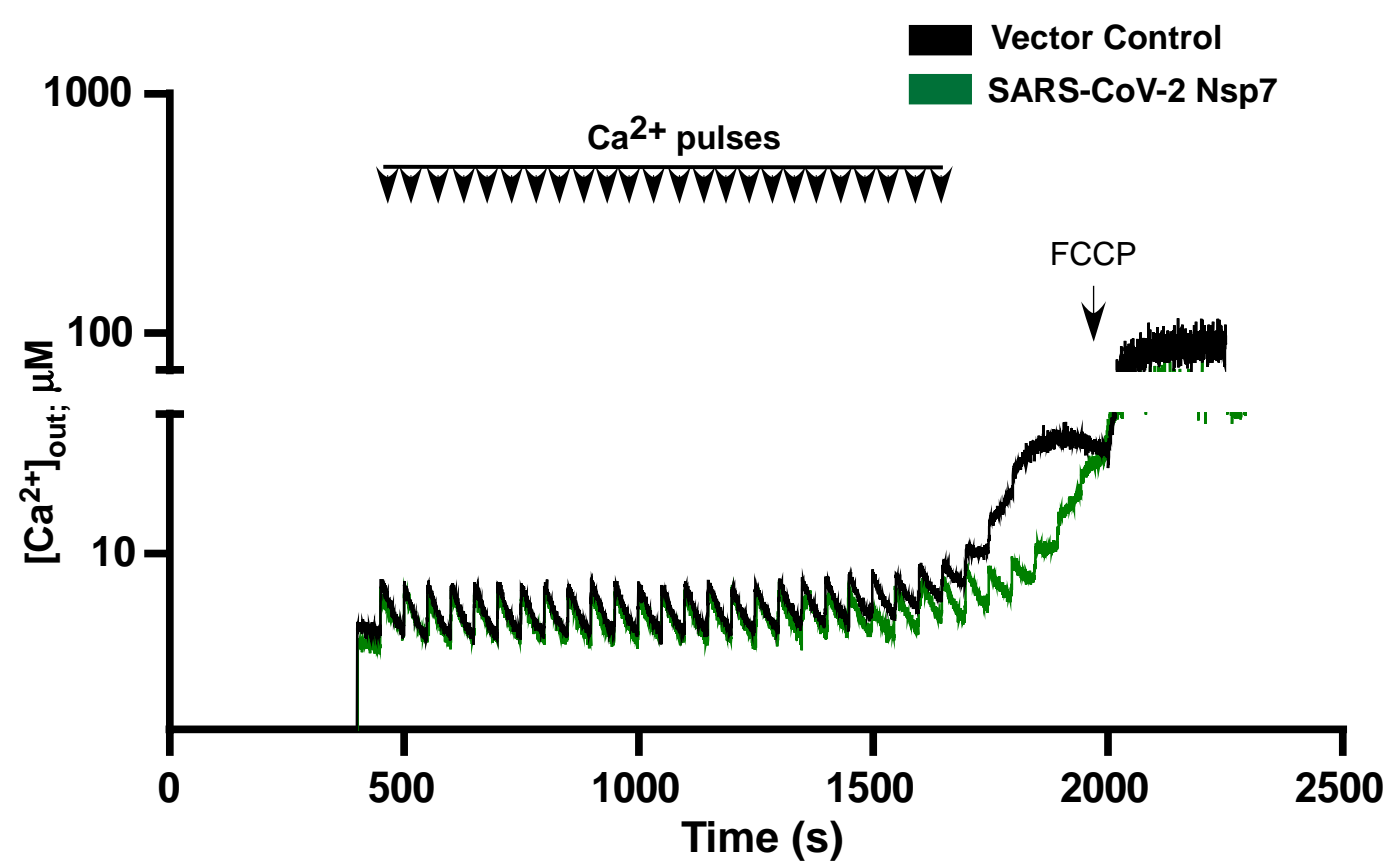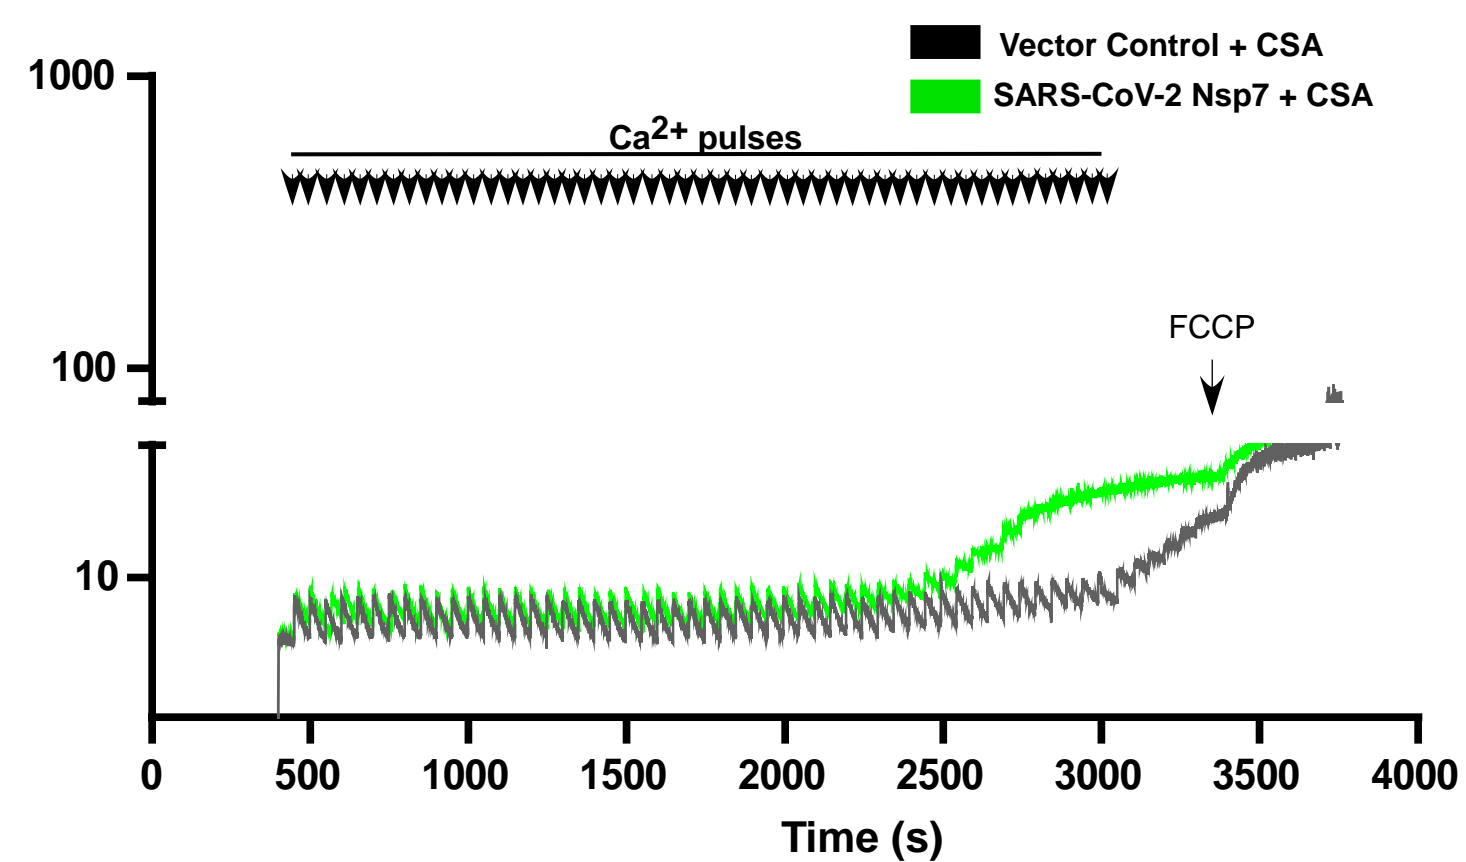

**Figure S6: Effect of cyclosporin A on SARS-CoV-2 protein-induced mitochondrial CRC change, Related to Figure 6.**

**(A-D)** Representative traces of number of  $\text{Ca}^{2+}$  pulses cleared by mitochondria (CRC). Vector or SARS-CoV-2 ORF9c, NSP6, ORF3a, and NSP7 stably expressing HEK293 cells were permeabilized and exposed to boluses of  $10 \mu\text{M}$   $\text{Ca}^{2+}$  pulses with (C) or without (D) cyclosporin A ( $1 \mu\text{M}$ ) at the indicated time point.  $n=3-5$  independent experiments.
